# Supplementary material for: Kasumi leukemia cell lines: characterization of tumor genomes with ethnic origin and scales of genomic alterations
Source: PubMed Central journal article supplement (PMC7324421; doi:10.1007/s13577-020-00347-5), 2020-03-16
Supplement: 13577_2020_347_MOESM1_ESM.pdf [file 13577_2020_347_MOESM1_ESM.pdf]

## Figure legends

### Figure S1. Whole genome profiles by SNP microarray

Copy number profiles and allele differences are shown above and bottom in each figure. An apparently normal female profile is observed in Kasumi-4 (D). UPD can be detected by allele differences, which show two allelic patterns compared to three patterns in normal regions.

### Figure S2. Copy number alterations at significant loci

(A-C) CDKN2A(p16) region is highlighted in Kasumi-1, 7, 8 and 9, which show loss or deletions. (D) Chromosome 17 profiles of Kasumi-1, 5, 6 and 8 show LOH at the TP53 region. Other minor changes are detected in Kasumi-1 at 14q21.3(E), chromosome 15 (F), 16q23.1 (G), in Kasumi-7 at 9q21.13 (H), in Kasumi-3 at 3q26.2 and 7q22.1 (I) and in Kasumi-3 and 8 at ETV6 locus (J)

### Figure S3. Flow cytometric histograms of cell surface markers

Percentages of positive cells are listed in Table S13.

## Figure legends

### Figure S1. Whole genome profiles by SNP microarray

Copy number profiles and allele differences are shown above and bottom in each figure. An apparently normal female profile is observed in Kasumi-4 (D). UPD can be detected by allele differences, which show two allelic patterns compared to three patterns in normal regions.

### Figure S2. Copy number alterations at significant loci

(A-C) CDKN2A(p16) region is highlighted in Kasumi-1, 7, 8 and 9, which show loss or deletions. (D) Chromosome 17 profiles of Kasumi-1, 5, 6 and 8 show LOH at the TP53 region. Other minor changes are detected in Kasumi-1 at 14q21.3(E), chromosome 15 (F), 16q23.1 (G), in Kasumi-7 at 9q21.13 (H), in Kasumi-3 at 3q26.2 and 7q22.1 (I) and in Kasumi-3 and 8 at ETV6 locus (J)

### Figure S3. Flow cytometric histograms of cell surface markers

Percentages of positive cells are listed in Table S13.

# Chromosome 9 profiles

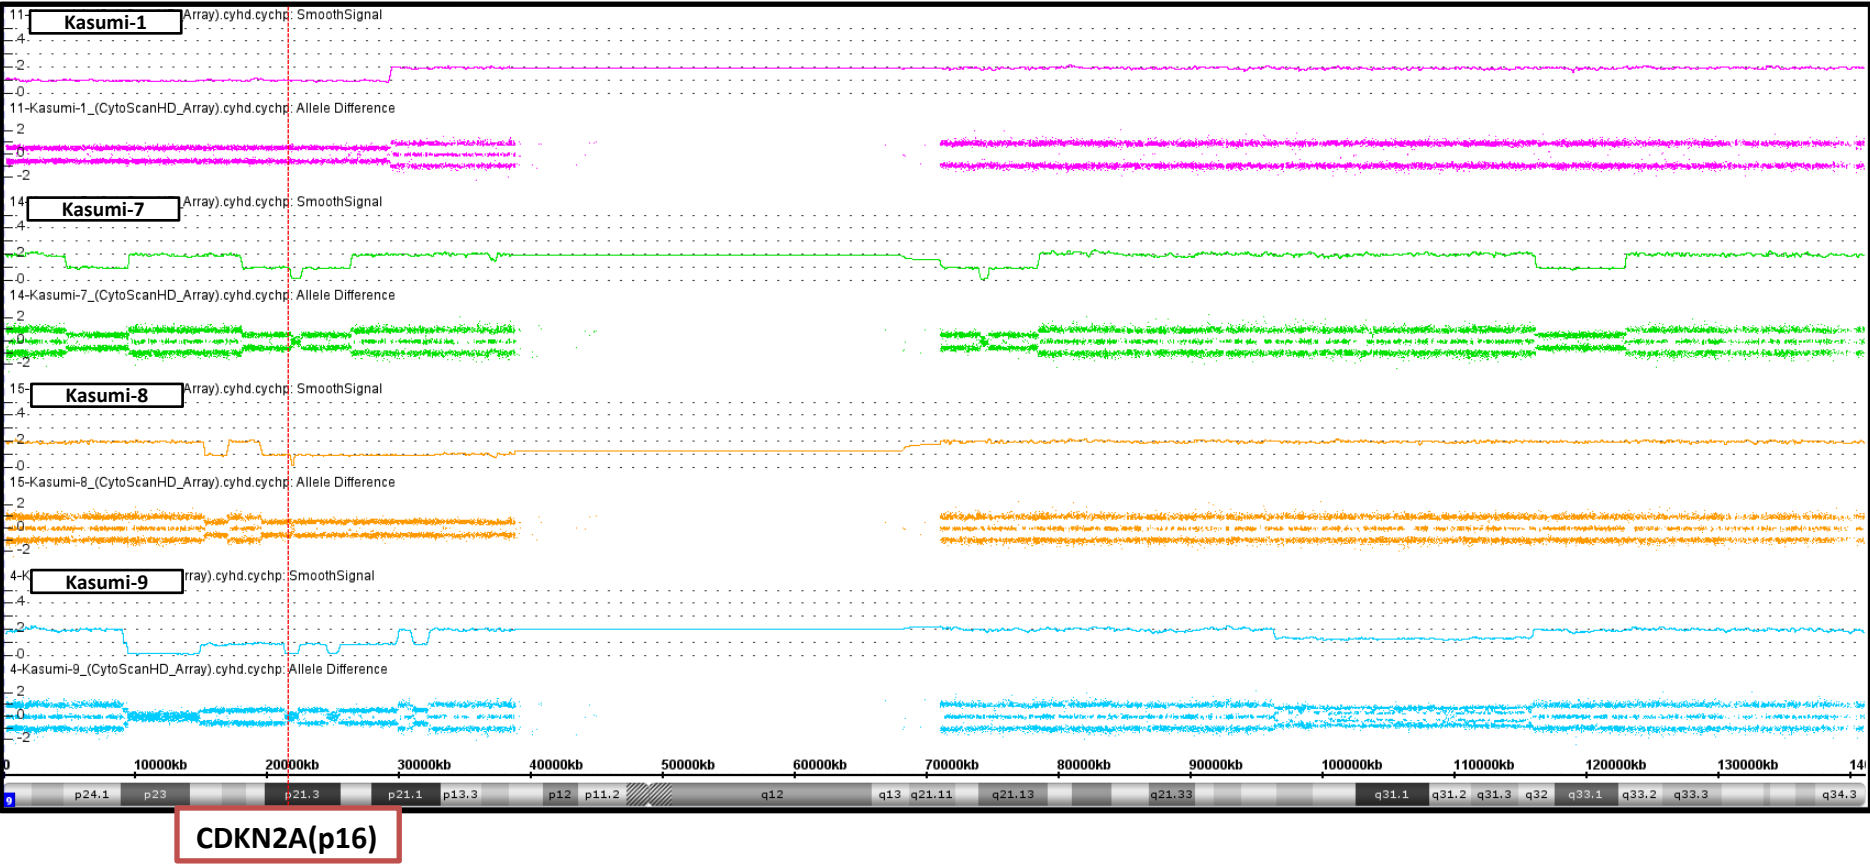

Figure S2A

# 9p profiles

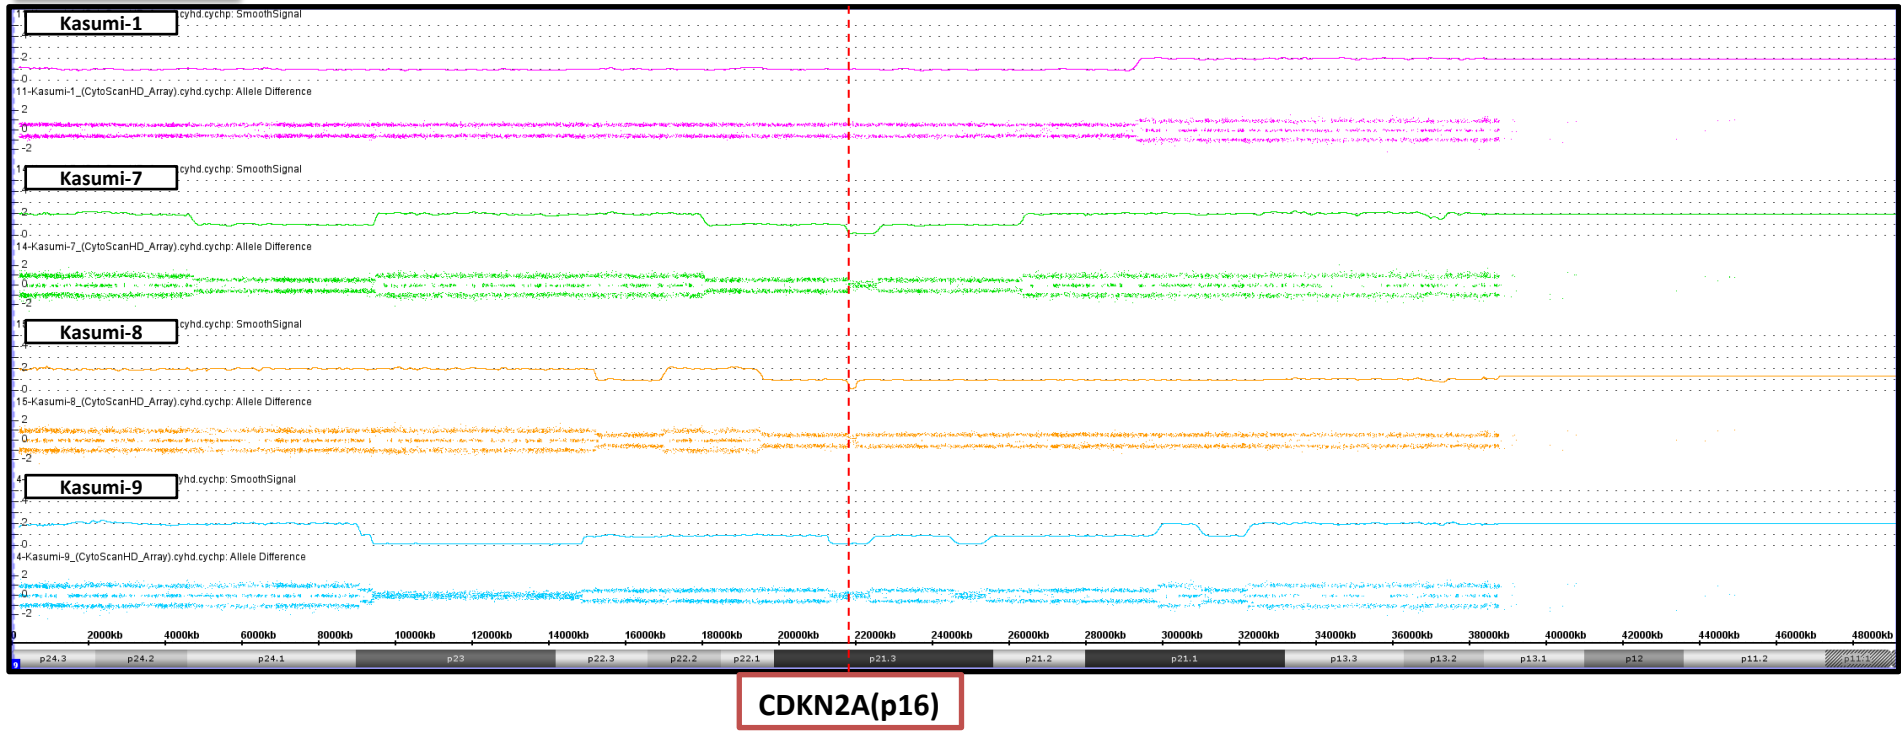

Figure S2B

# 9p21.3 profiles

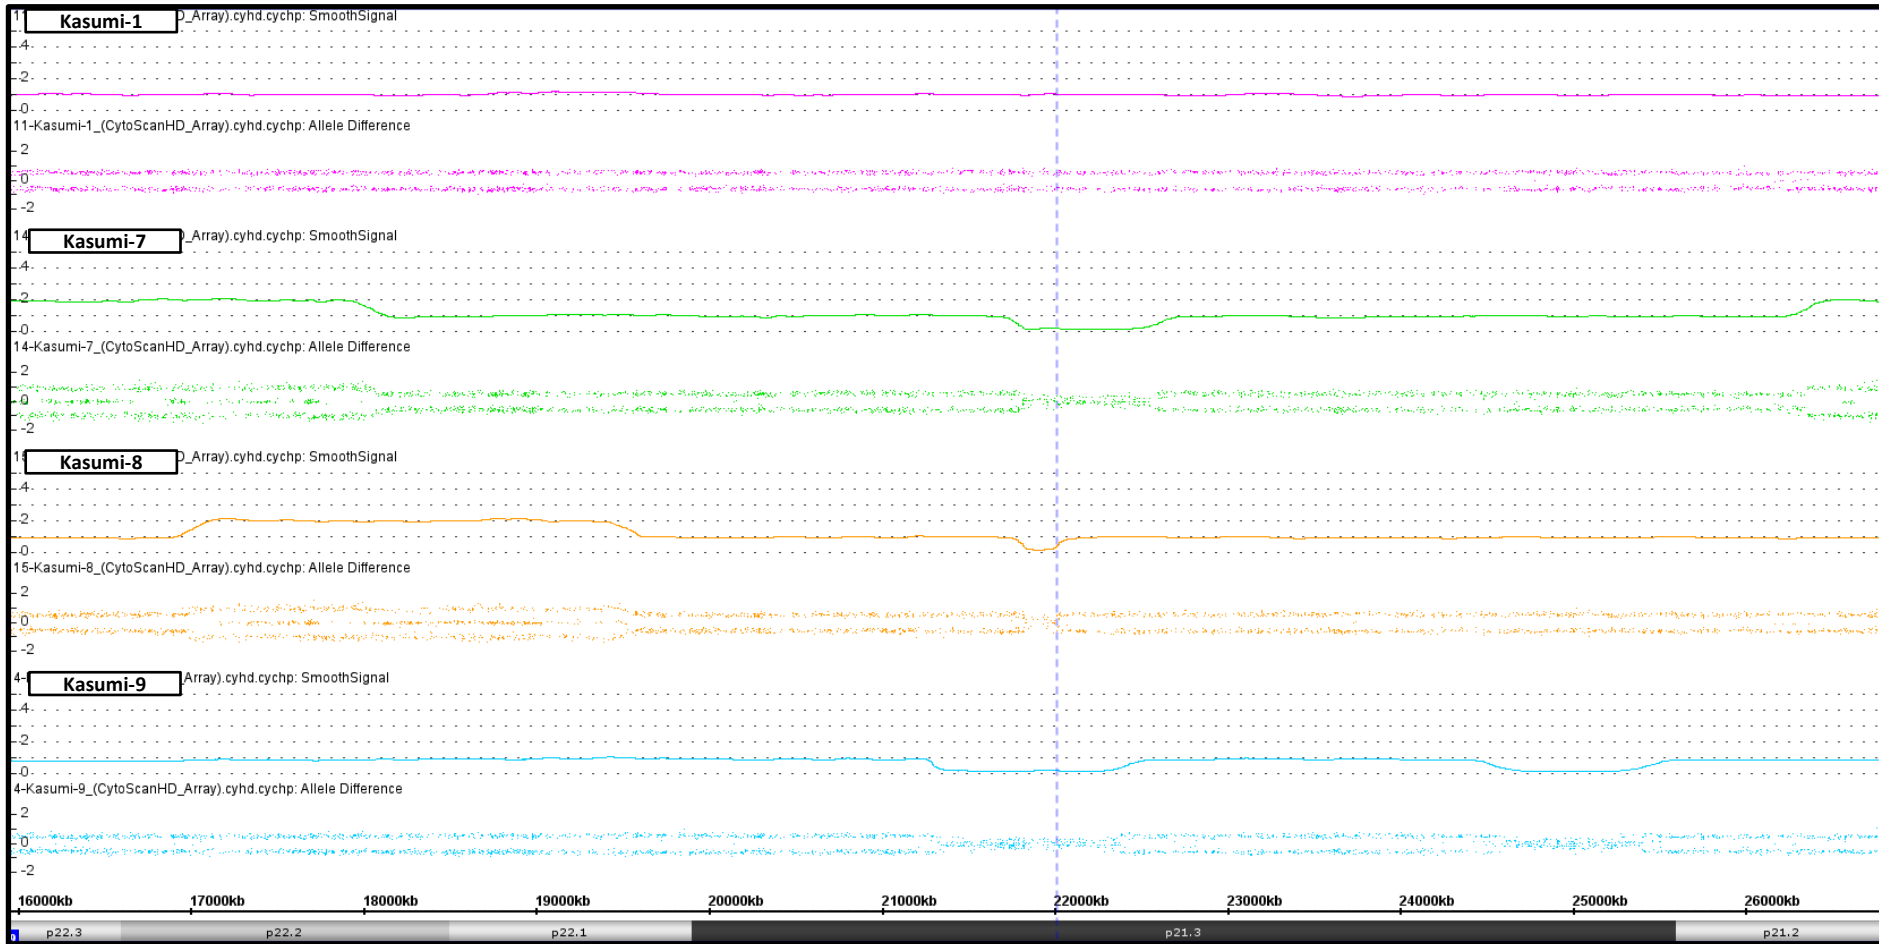

**CDKN2A(p16)**

Figure S2C

# Chromosome 17 profiles

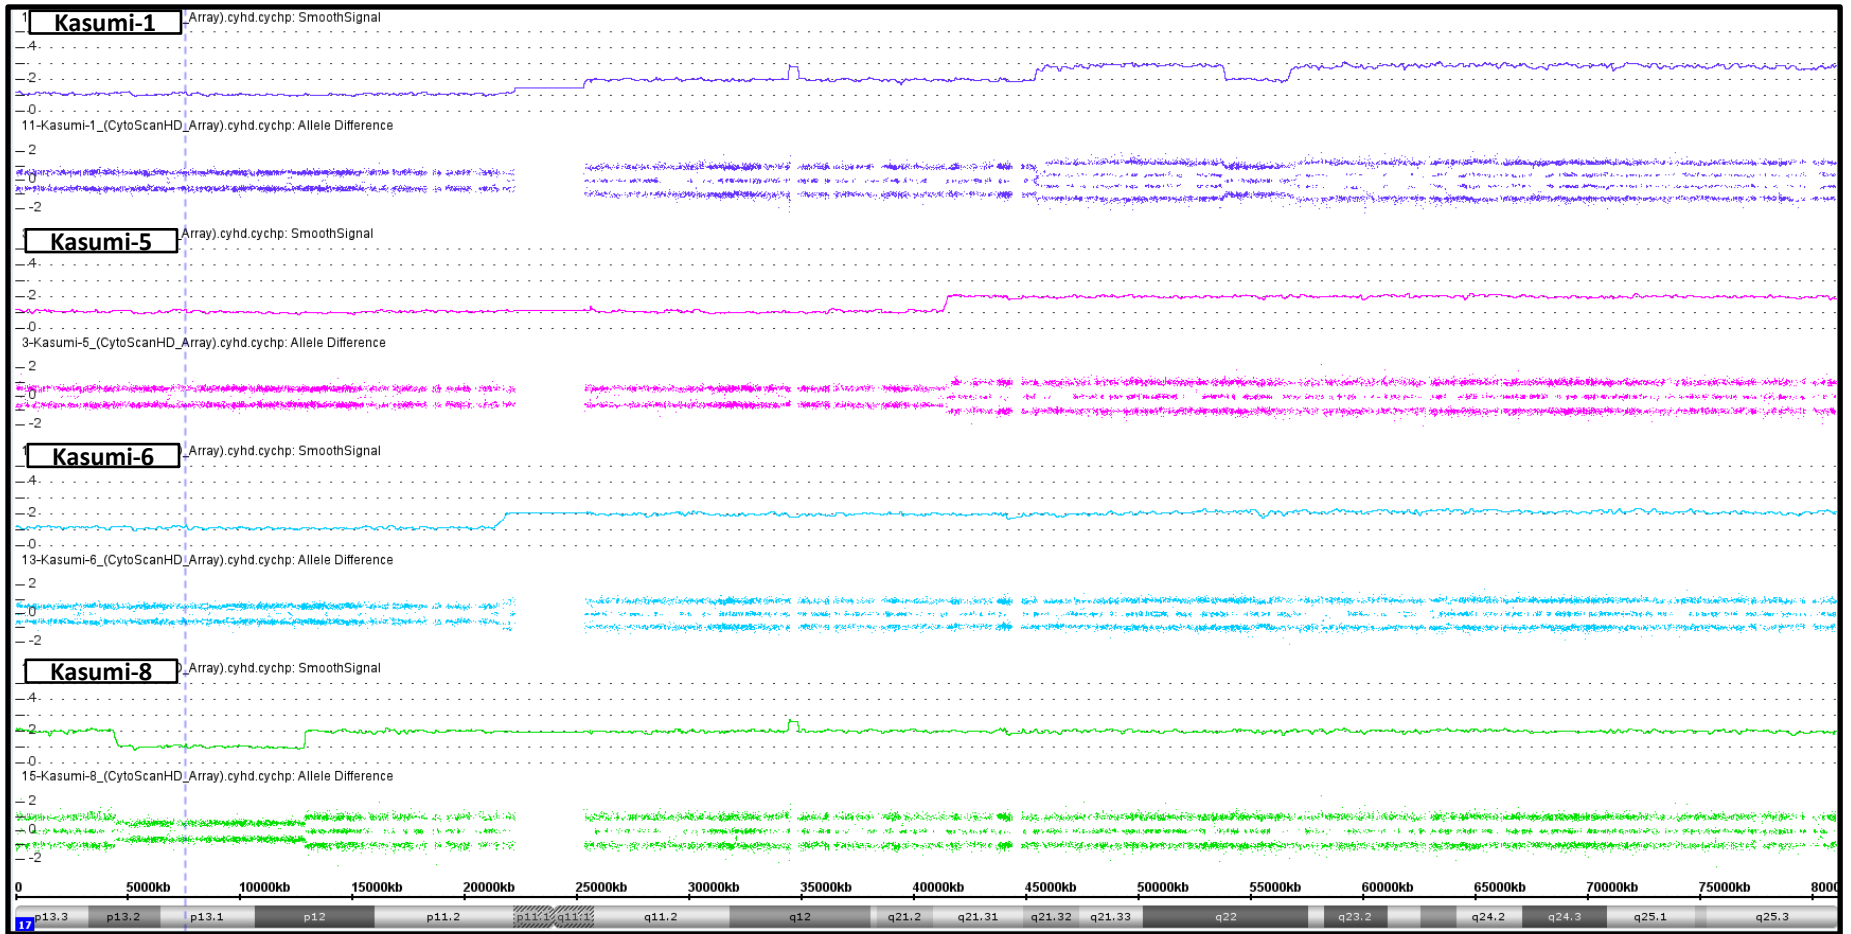

**TP53**

Figure S2D

# Kasumi-1, 14q21.3

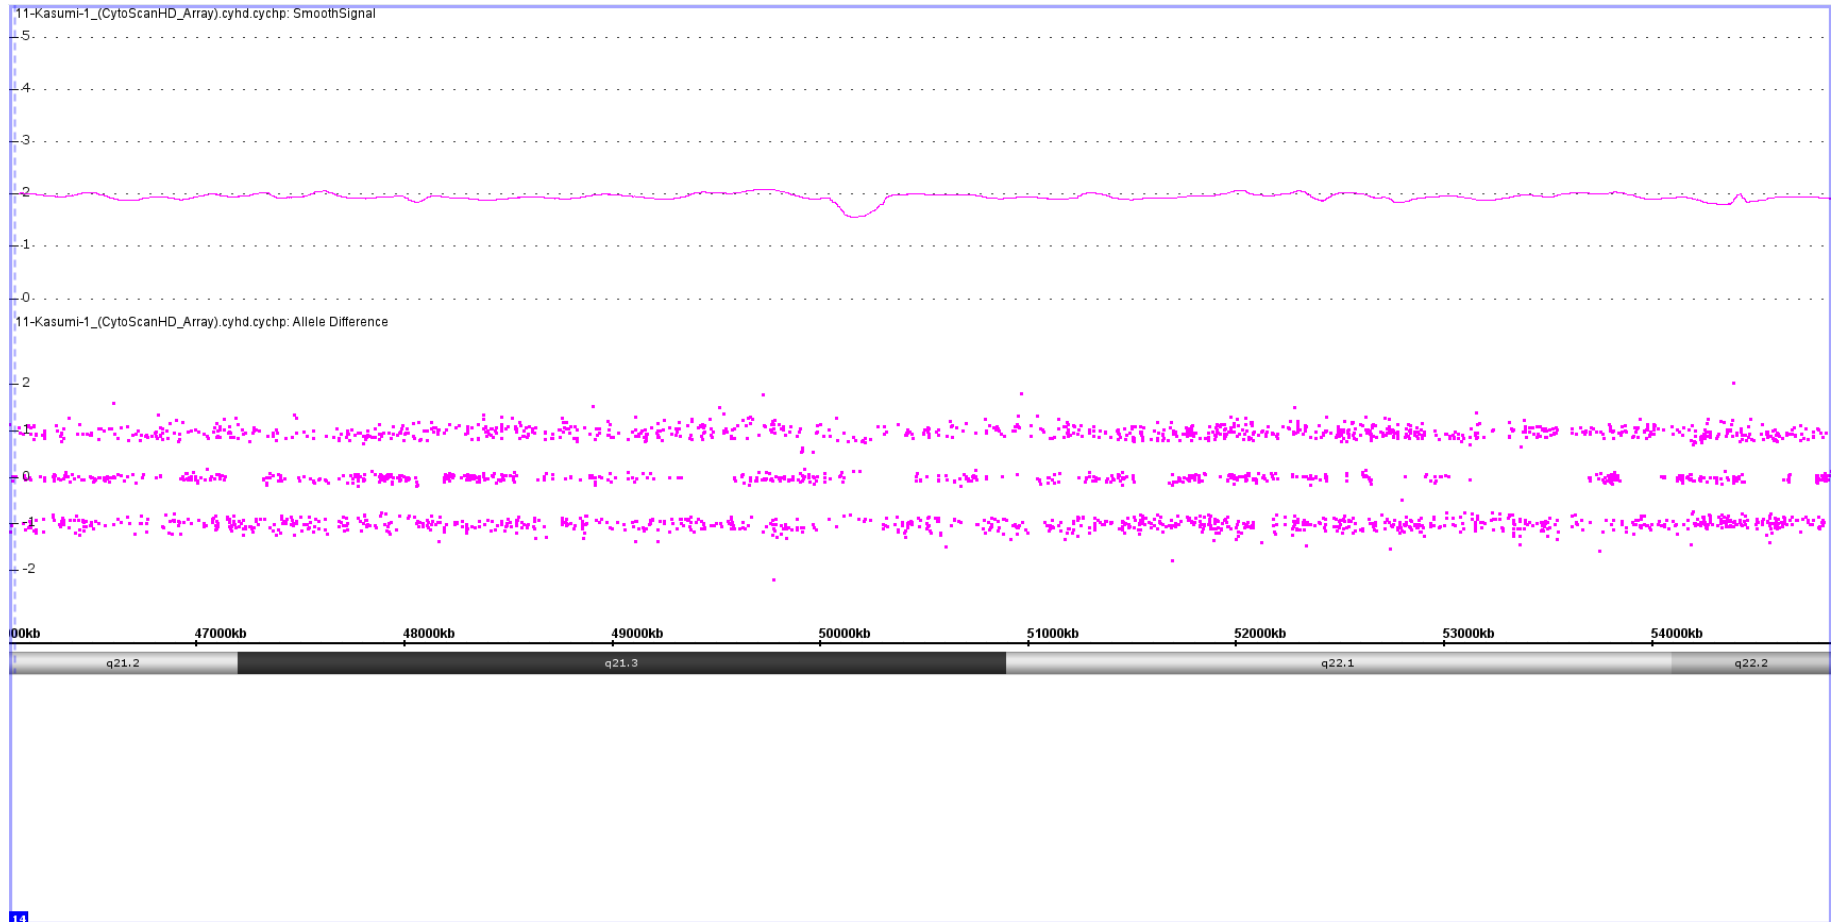

Figure S2E

# Kasumi-1, chromosome 15

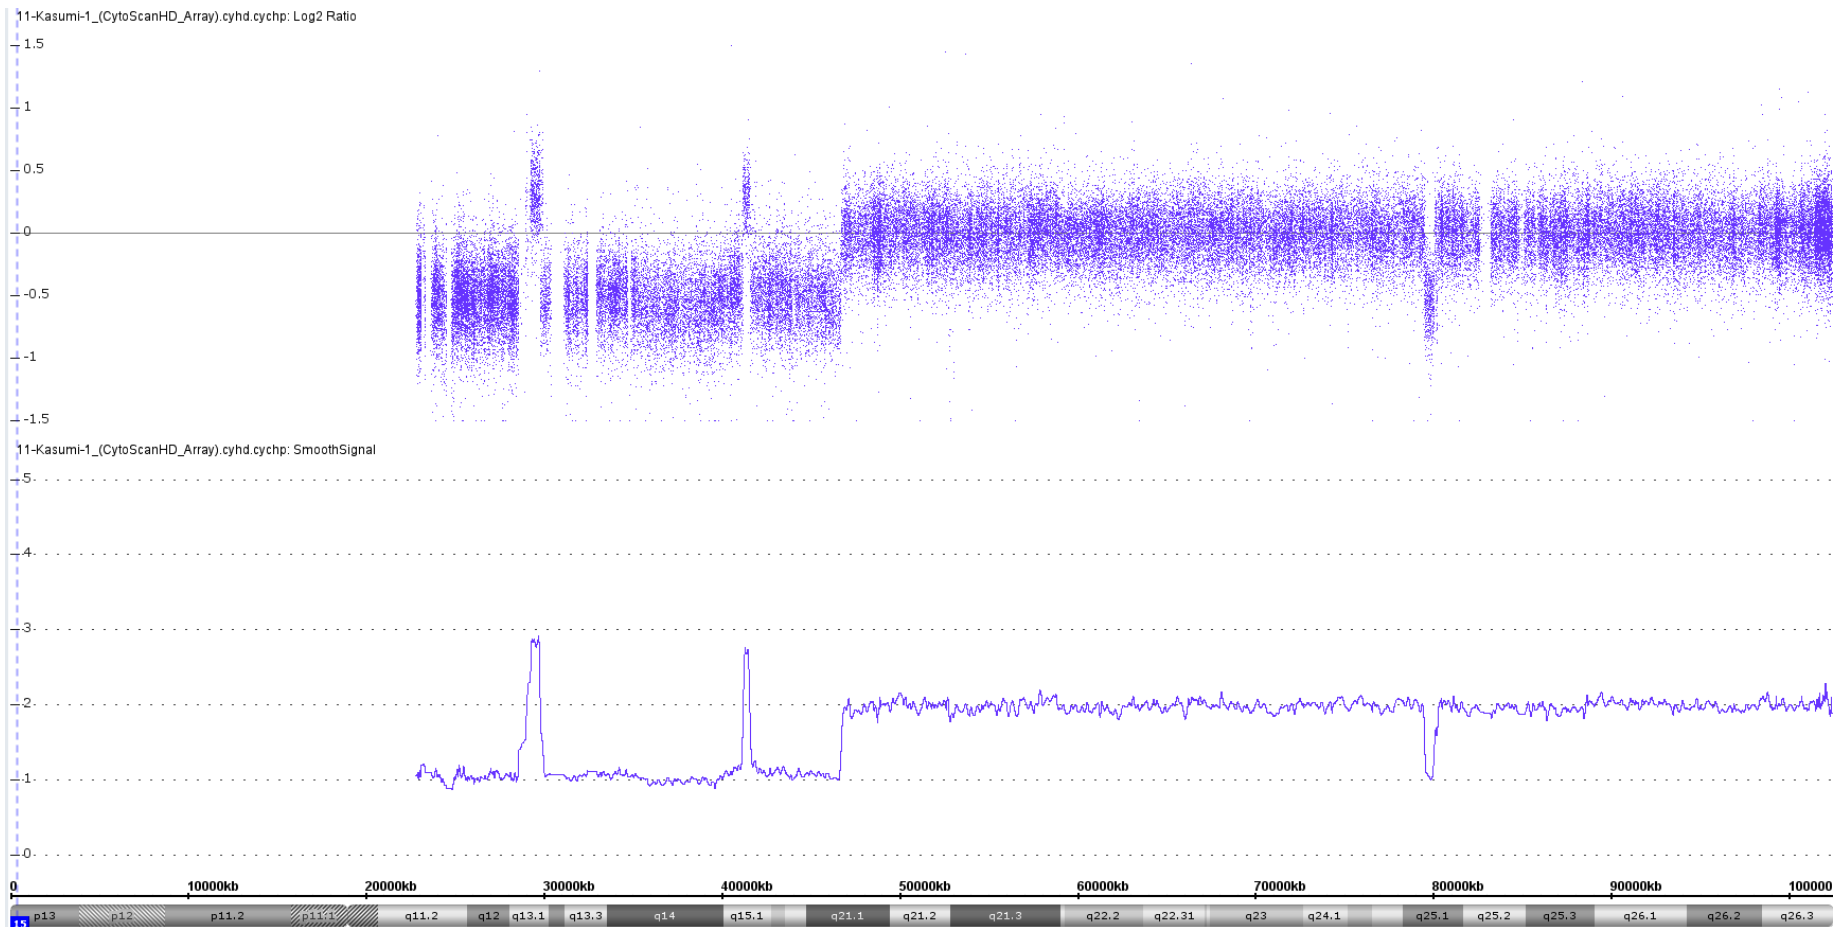

Figure S2F



# Kasumi-1, 16q23.1

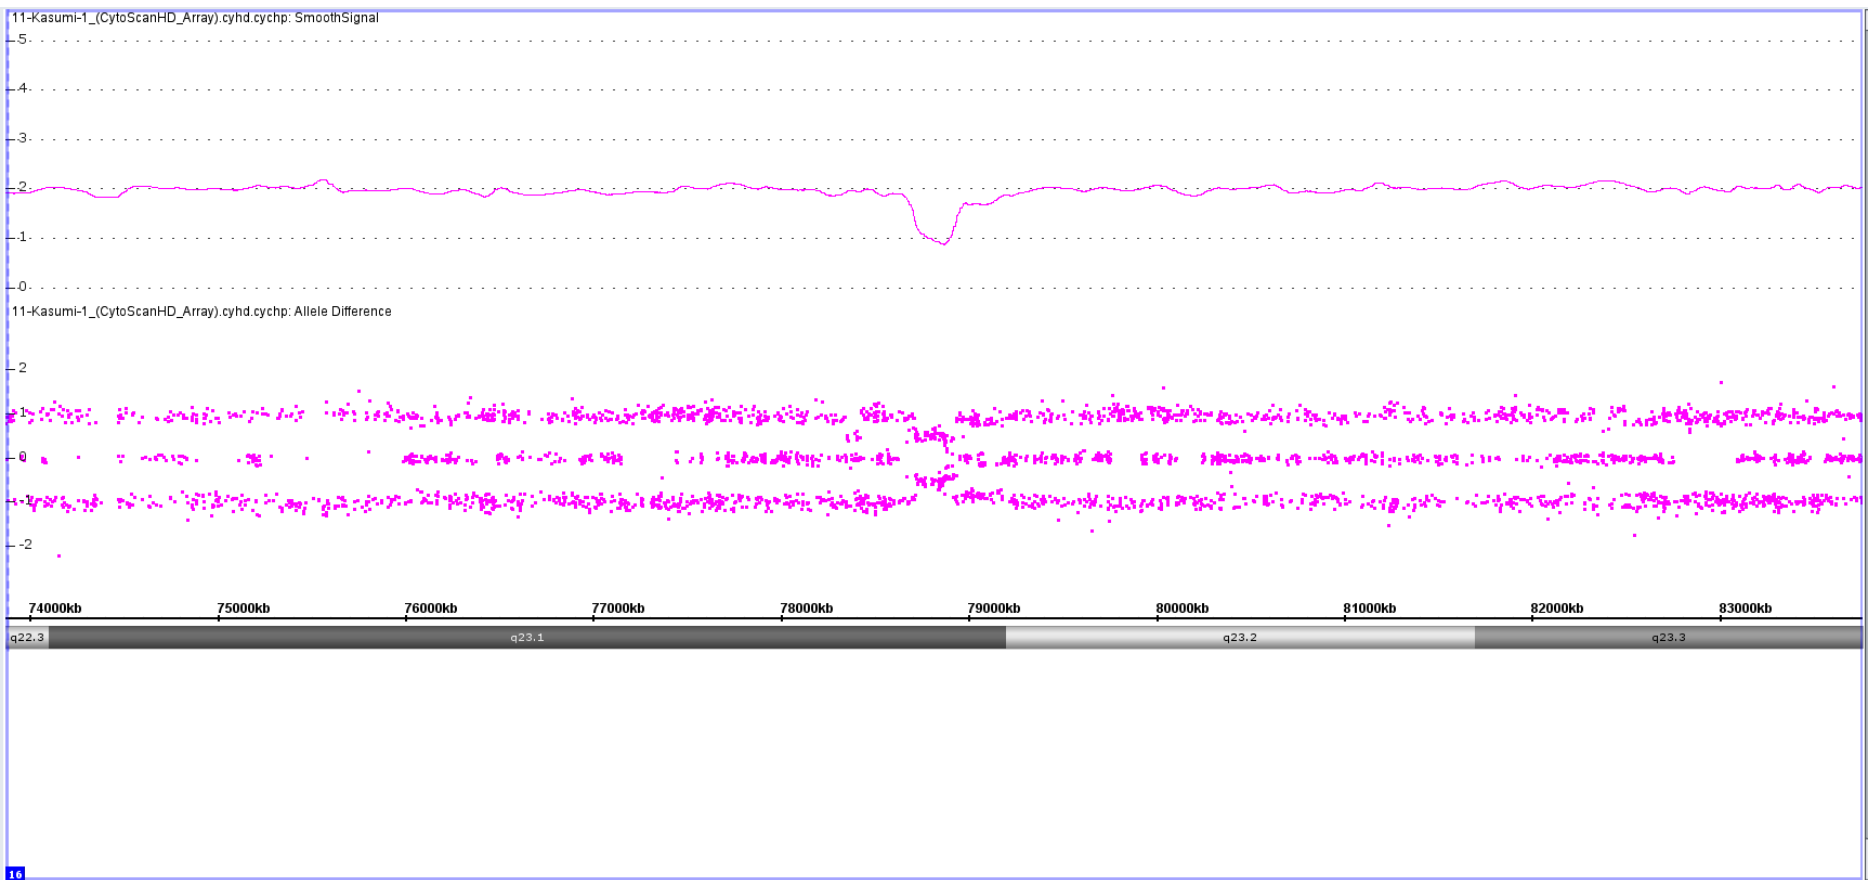

Figure S2G

## Kasumi-7, 9q21.13

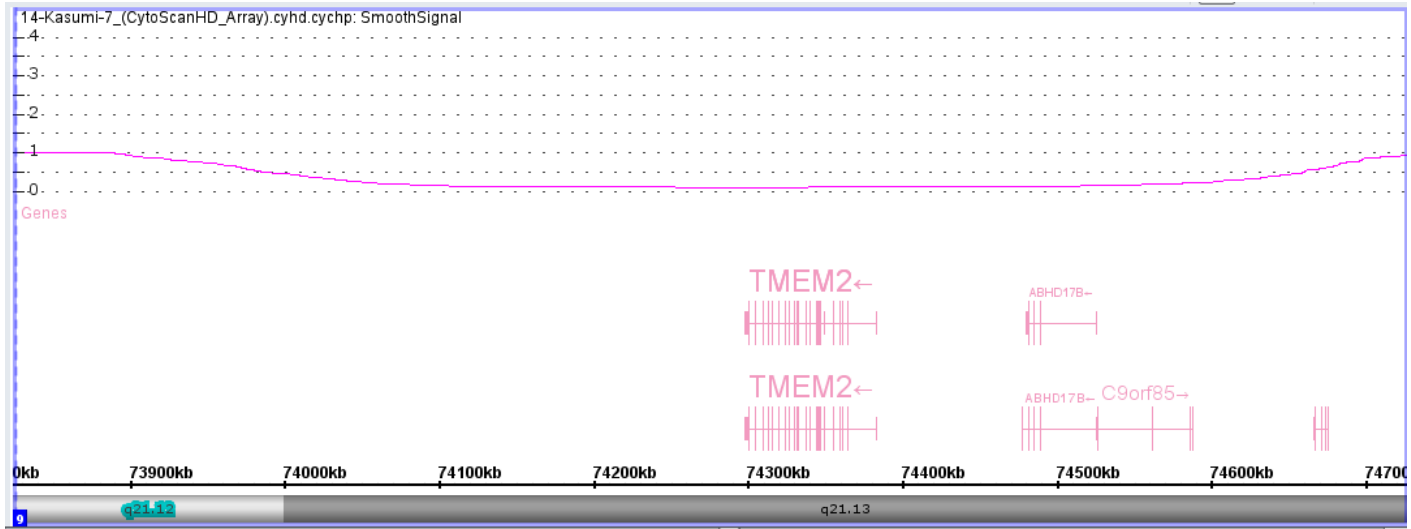

Figure S2H

## Kasumi-3, 3q26.2

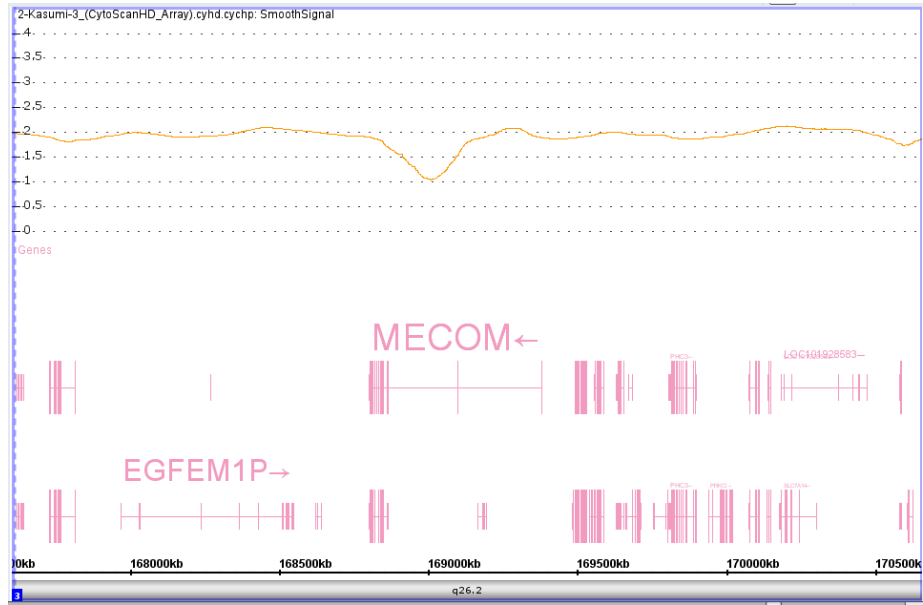

## Kasumi-3, 7q22.1

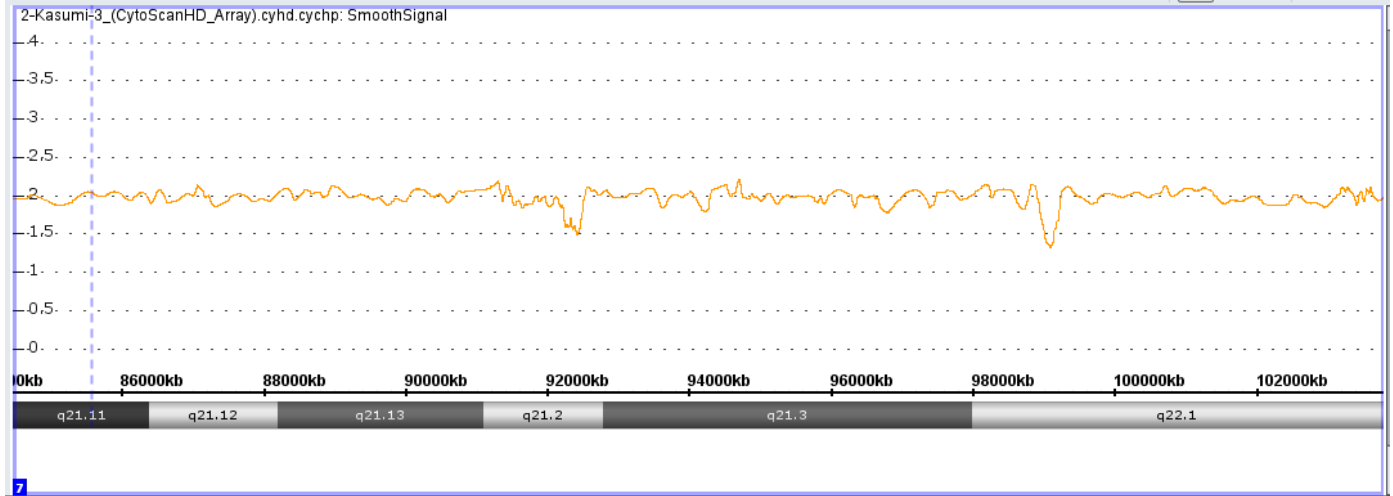

Figure S2I

# 12p13.2 profiles

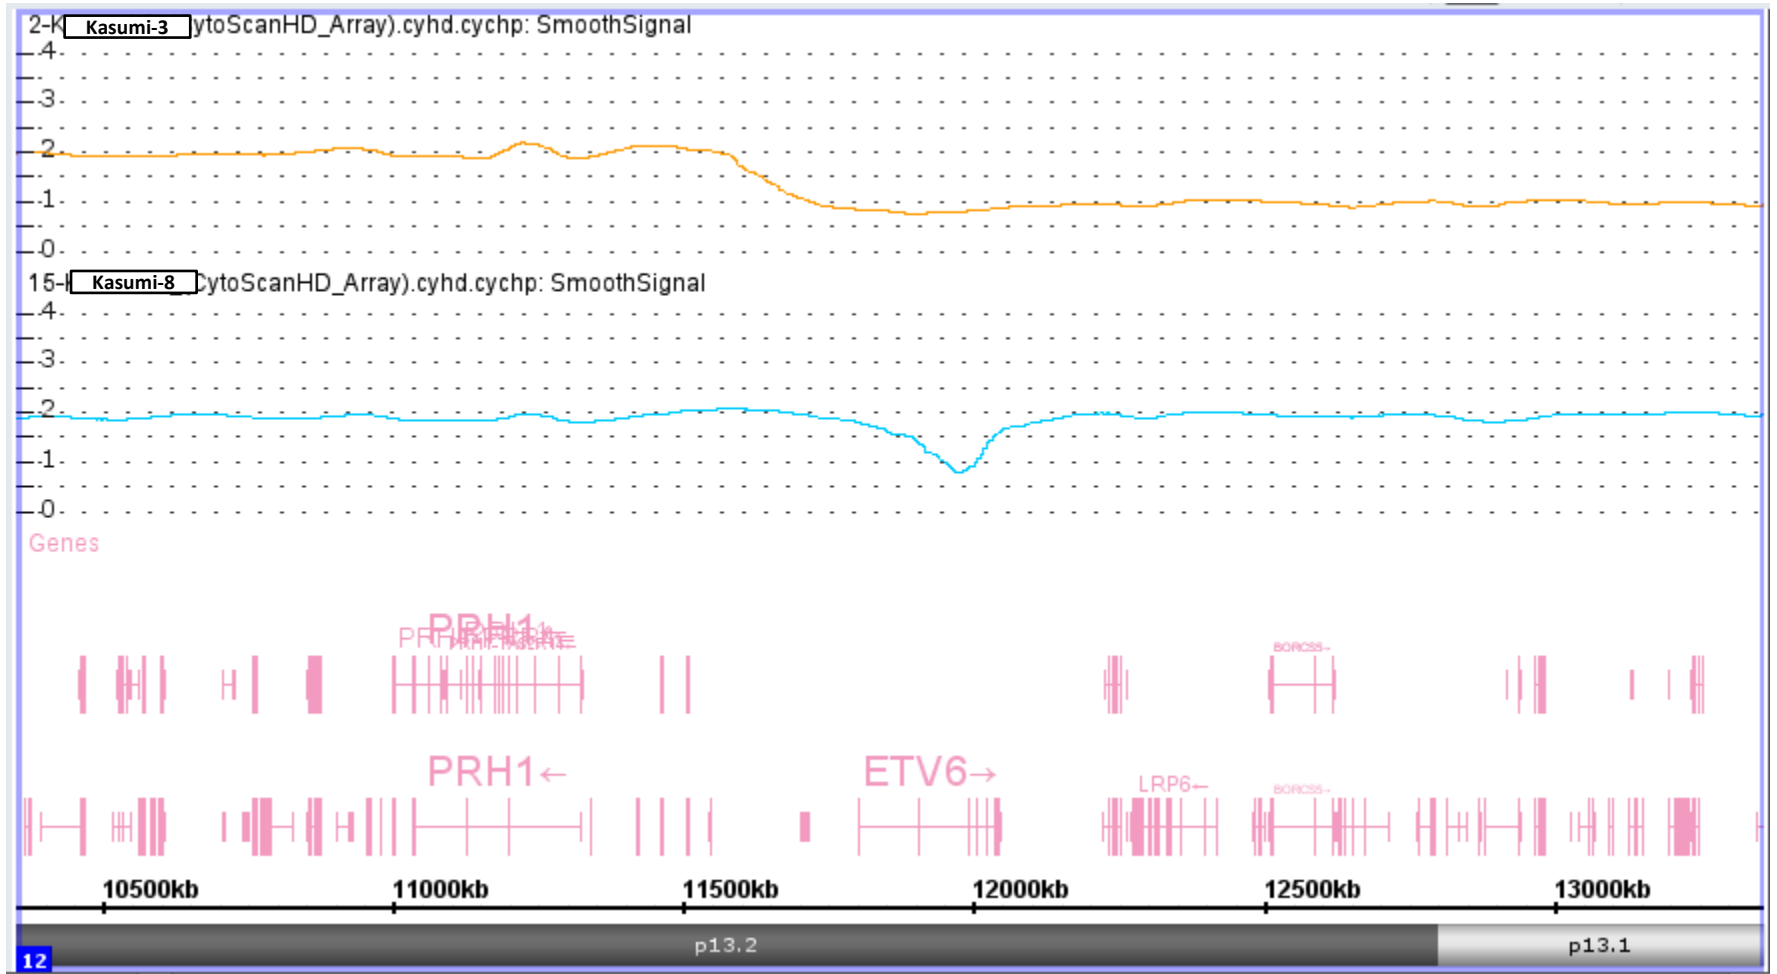

Figure S2J

Figure S3A

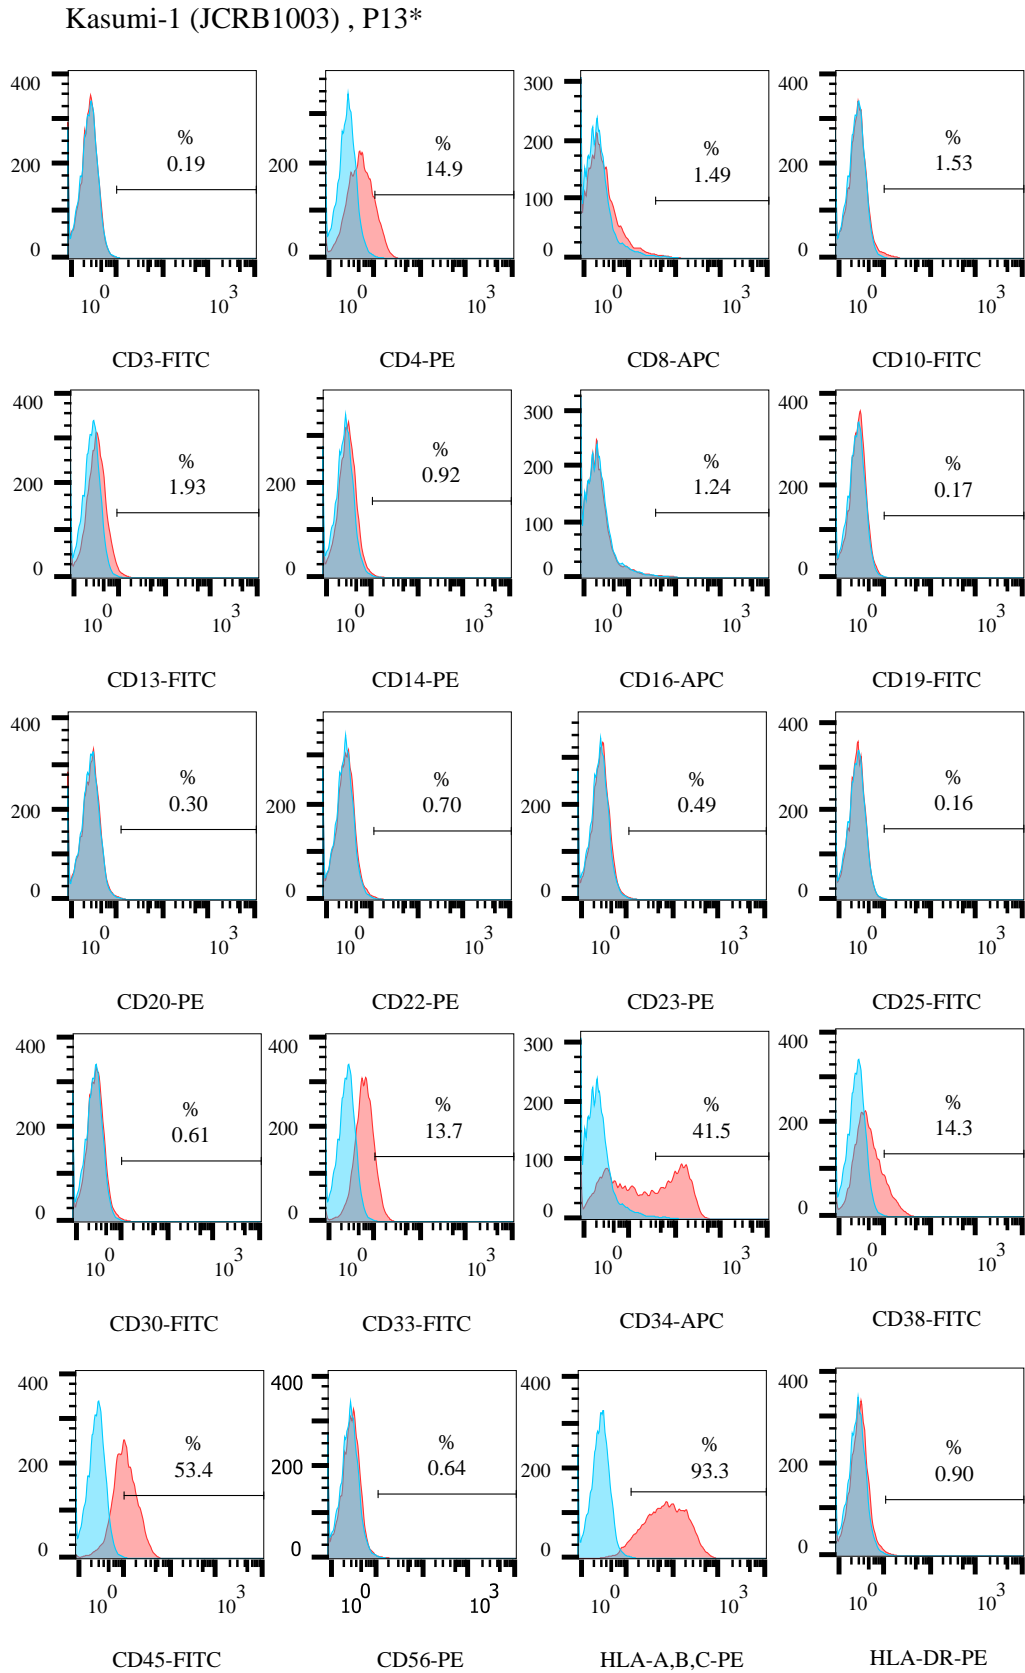

Figure S3B

Kasumi-2 (JCRB1395), P8\*

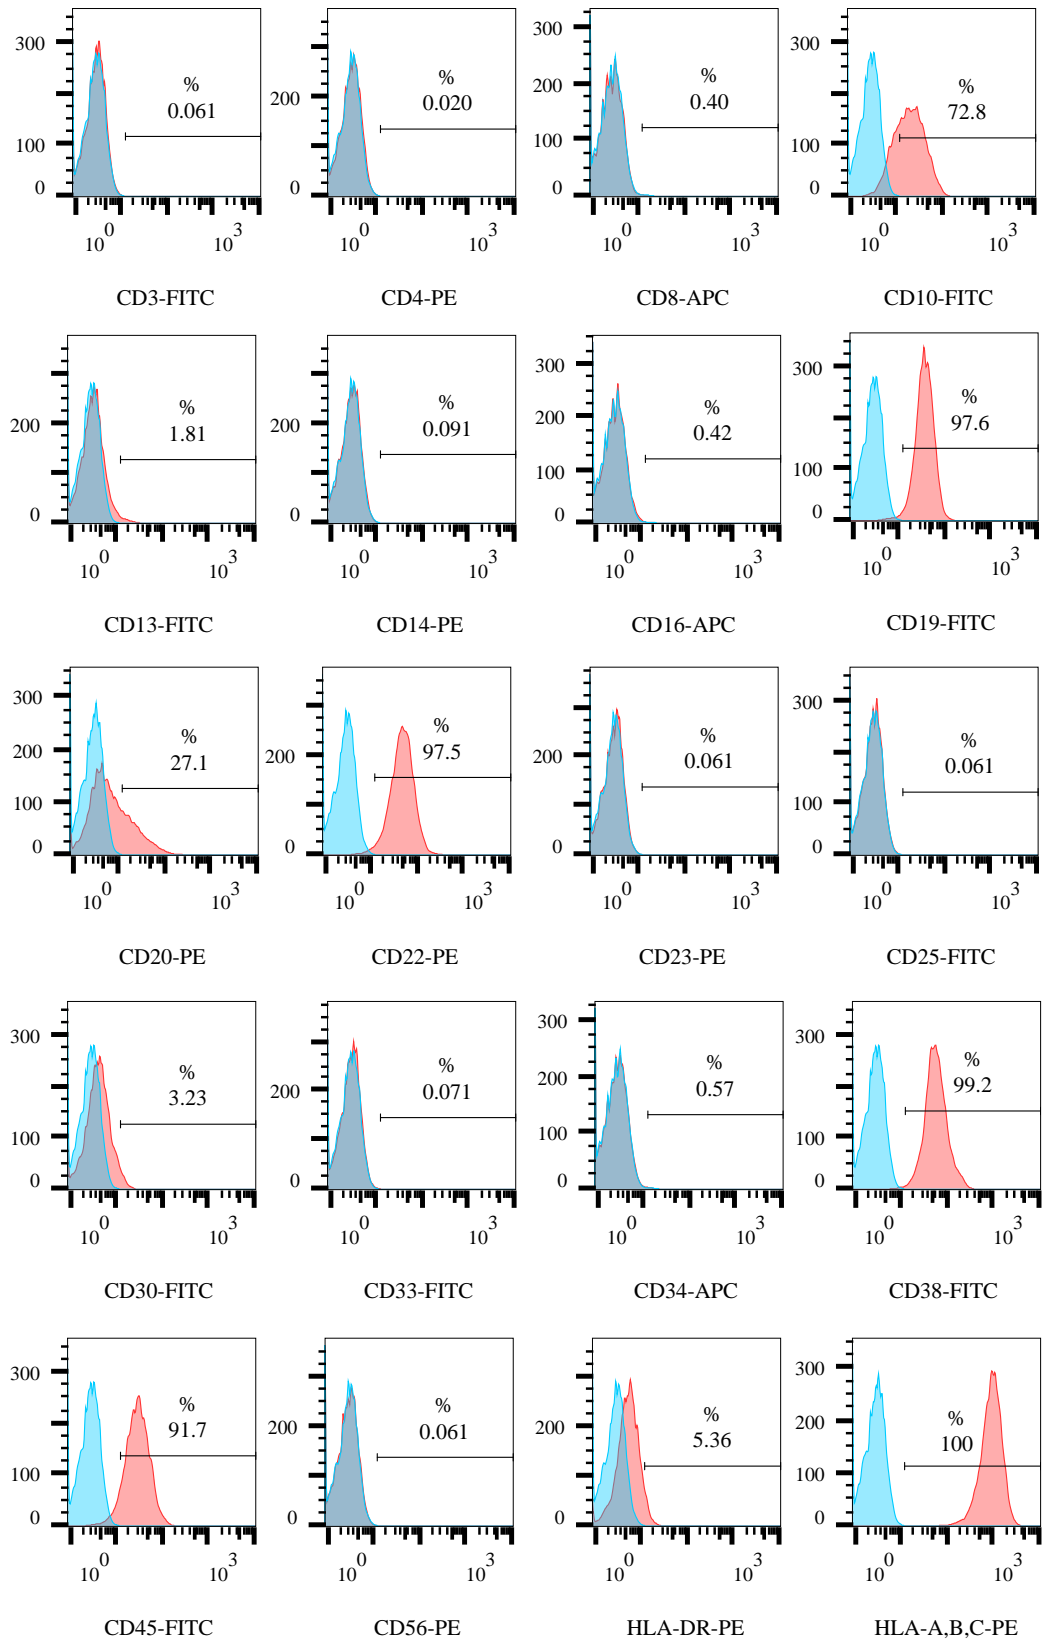

Figure S3C

Kasumi-3 (JCRB1004) , P25\*

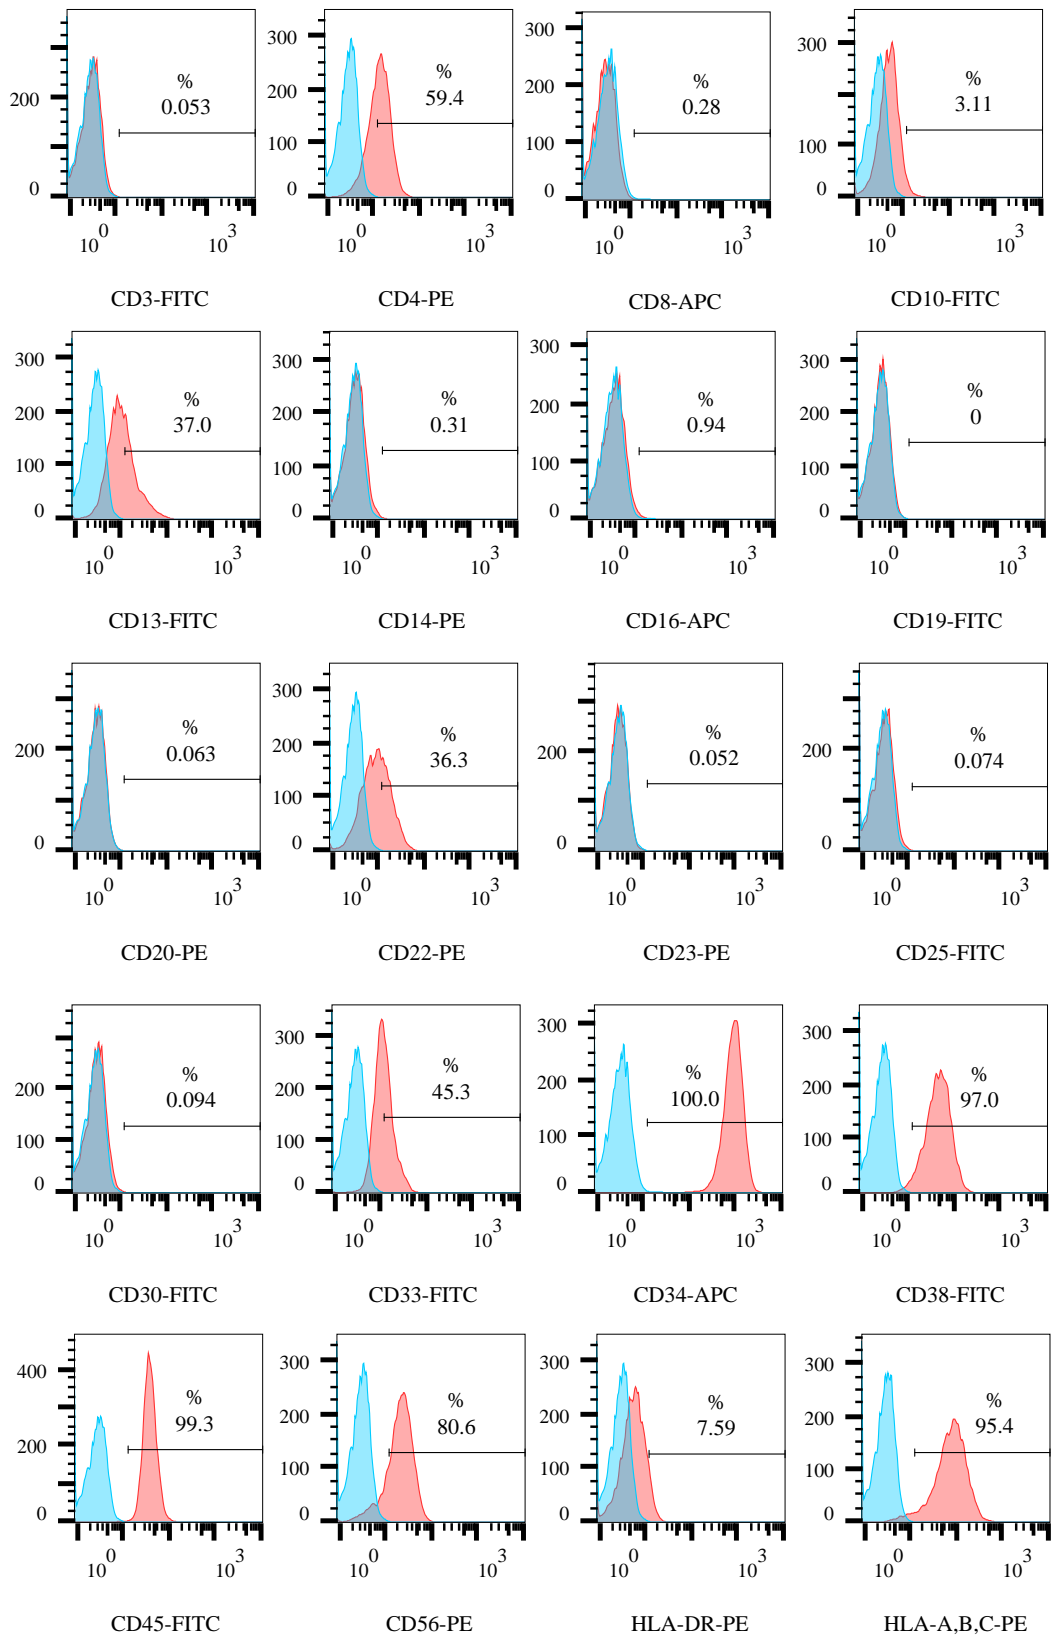

Figure S3D

Kasumi-4 (JCRB0161) , P13\*

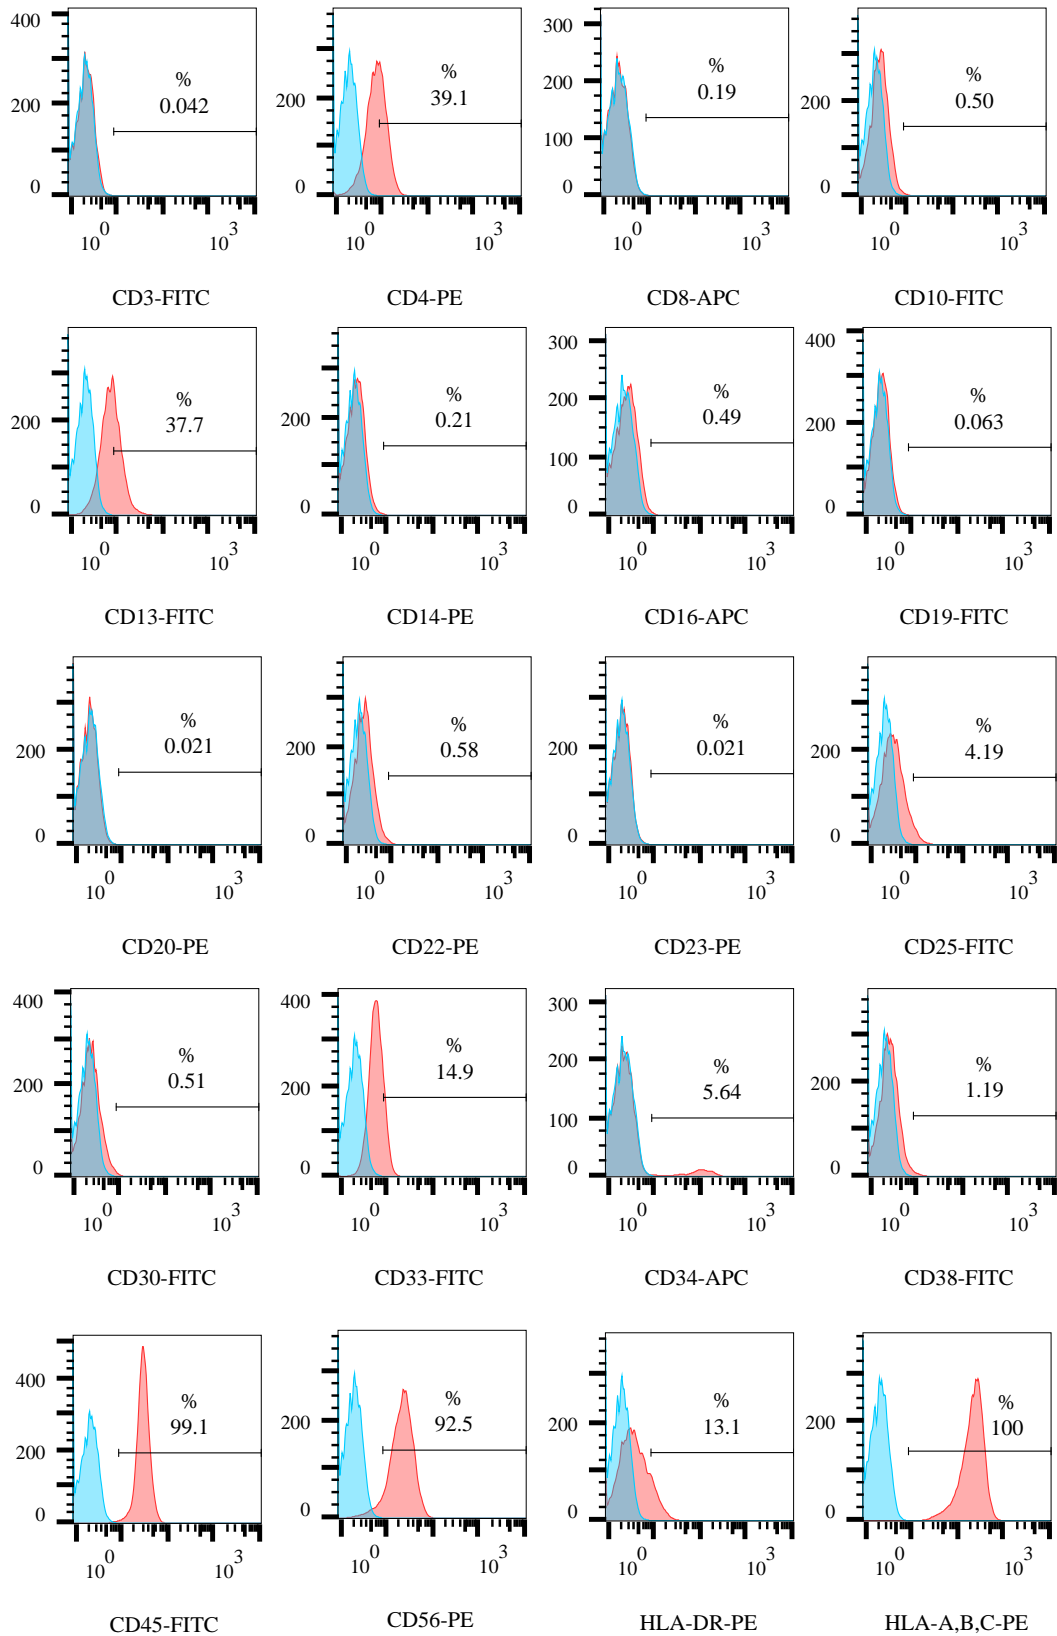



Figure S3E

Kasumi-5 (JCRB1398) , P14\*

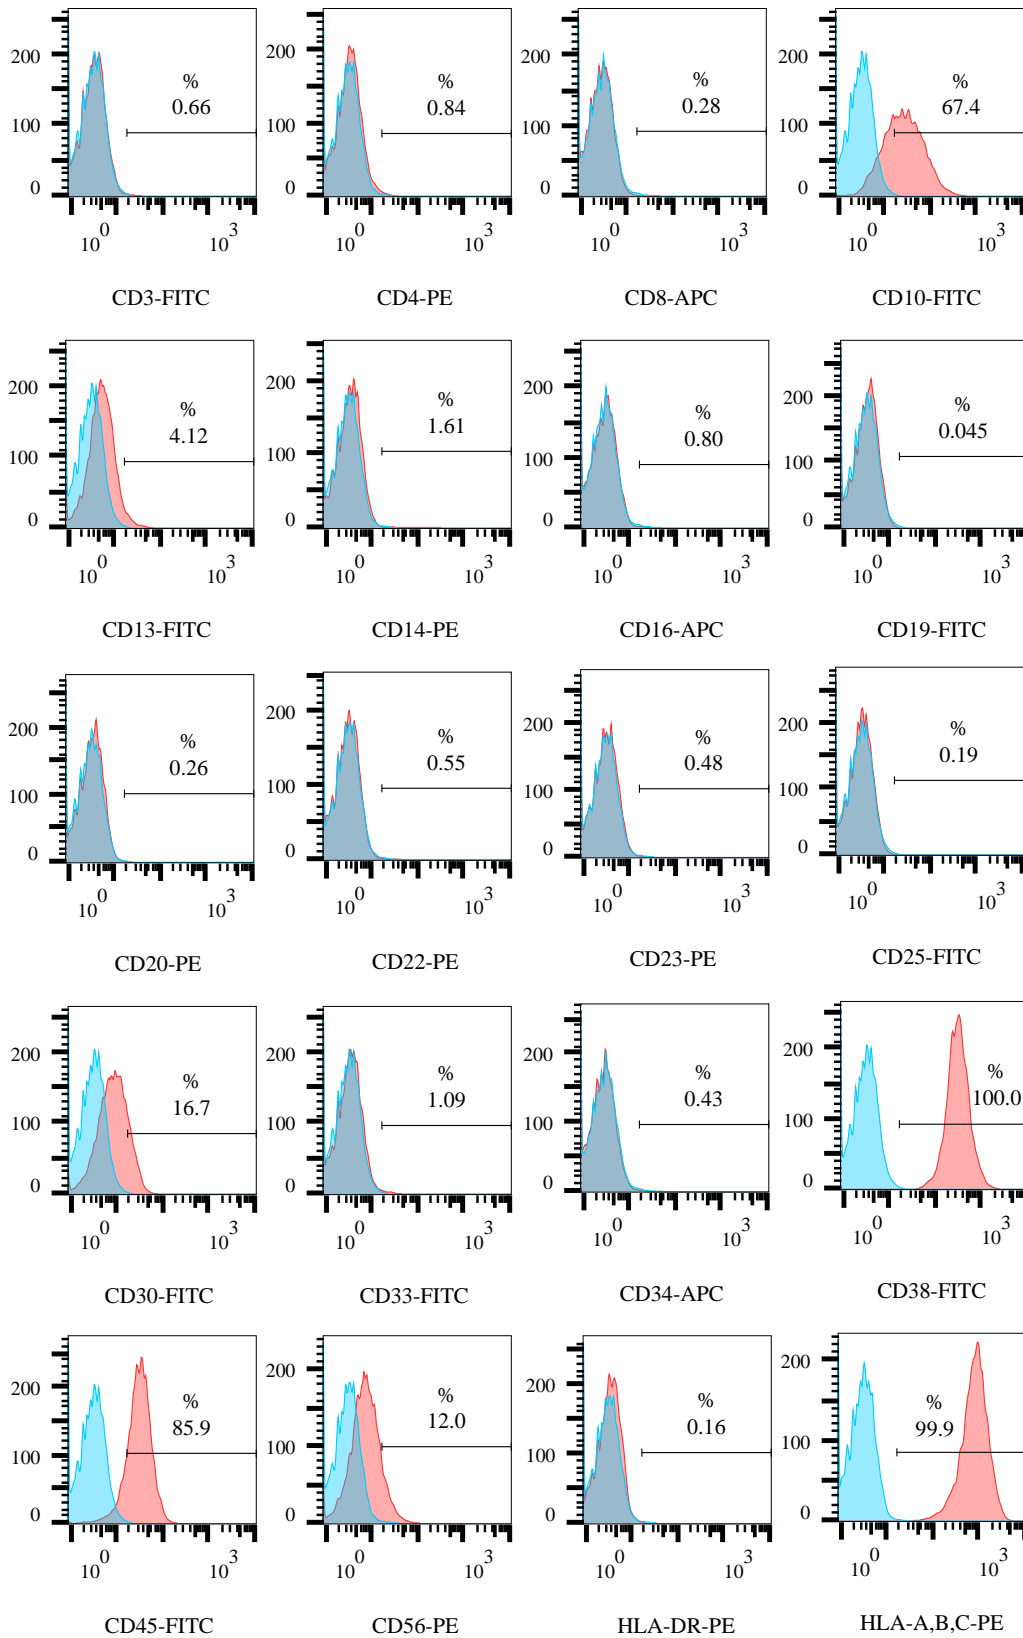

Figure S3F

Kasumi-6 (JCRB1024) , P6\*

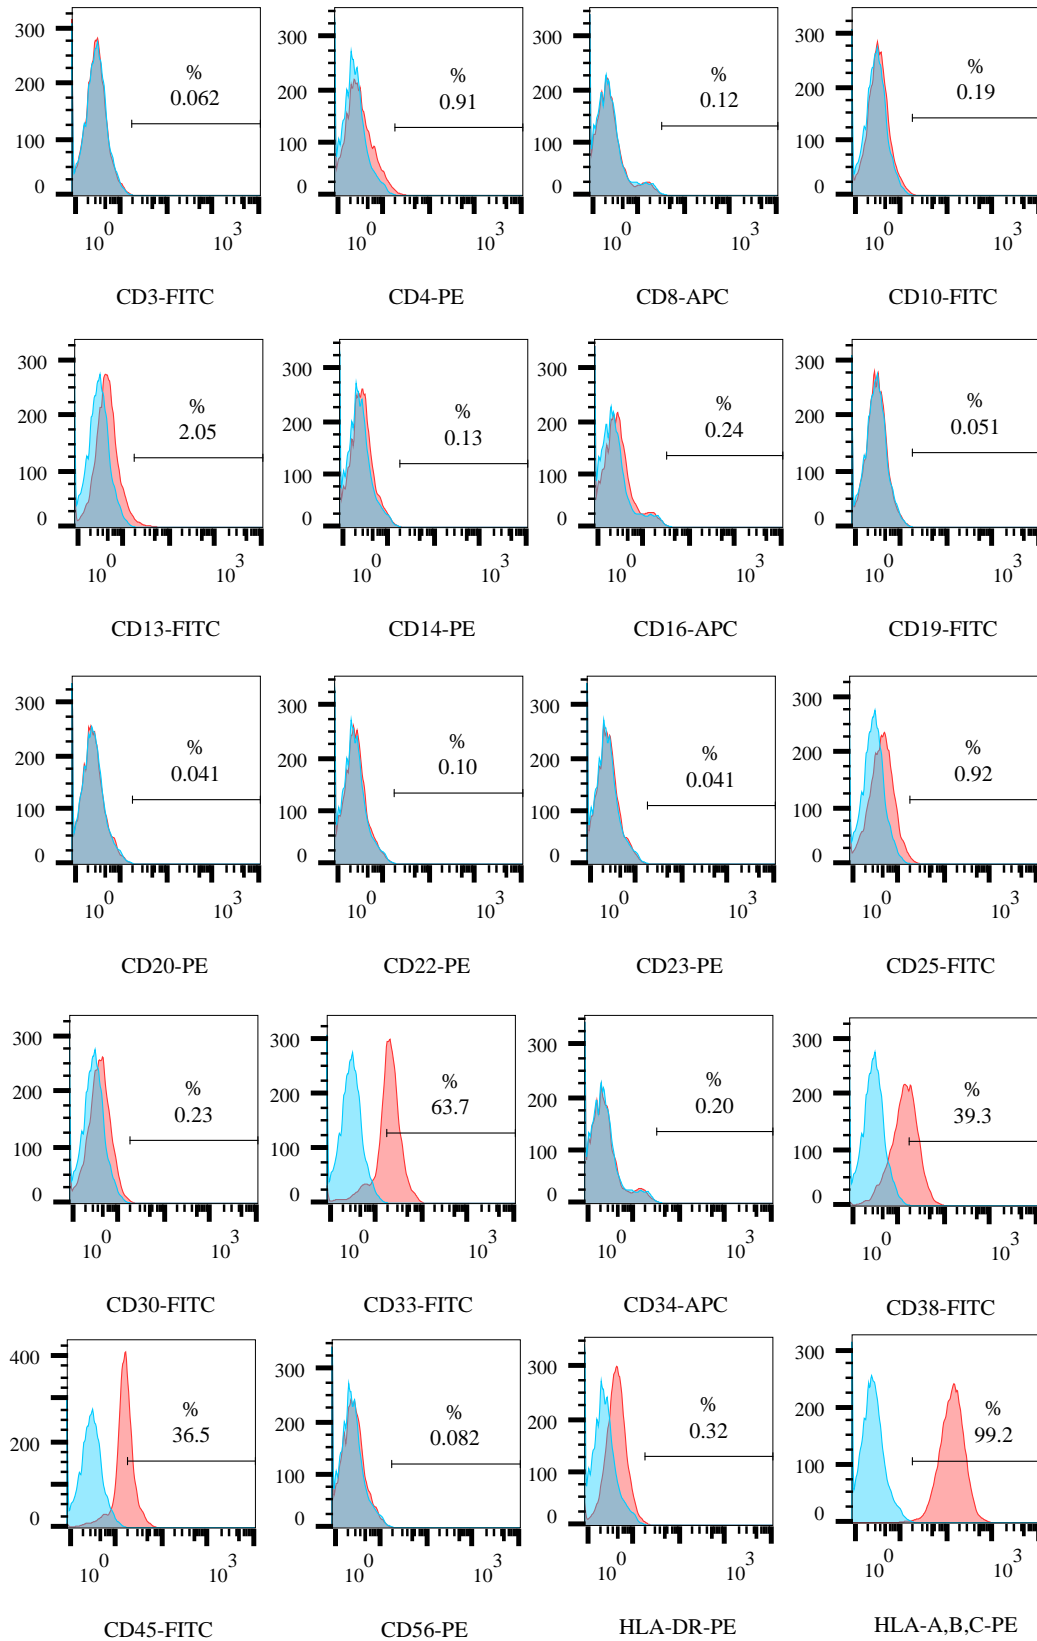

Figure S3G

Kasumi-7 (JCRB1401) , P6\*

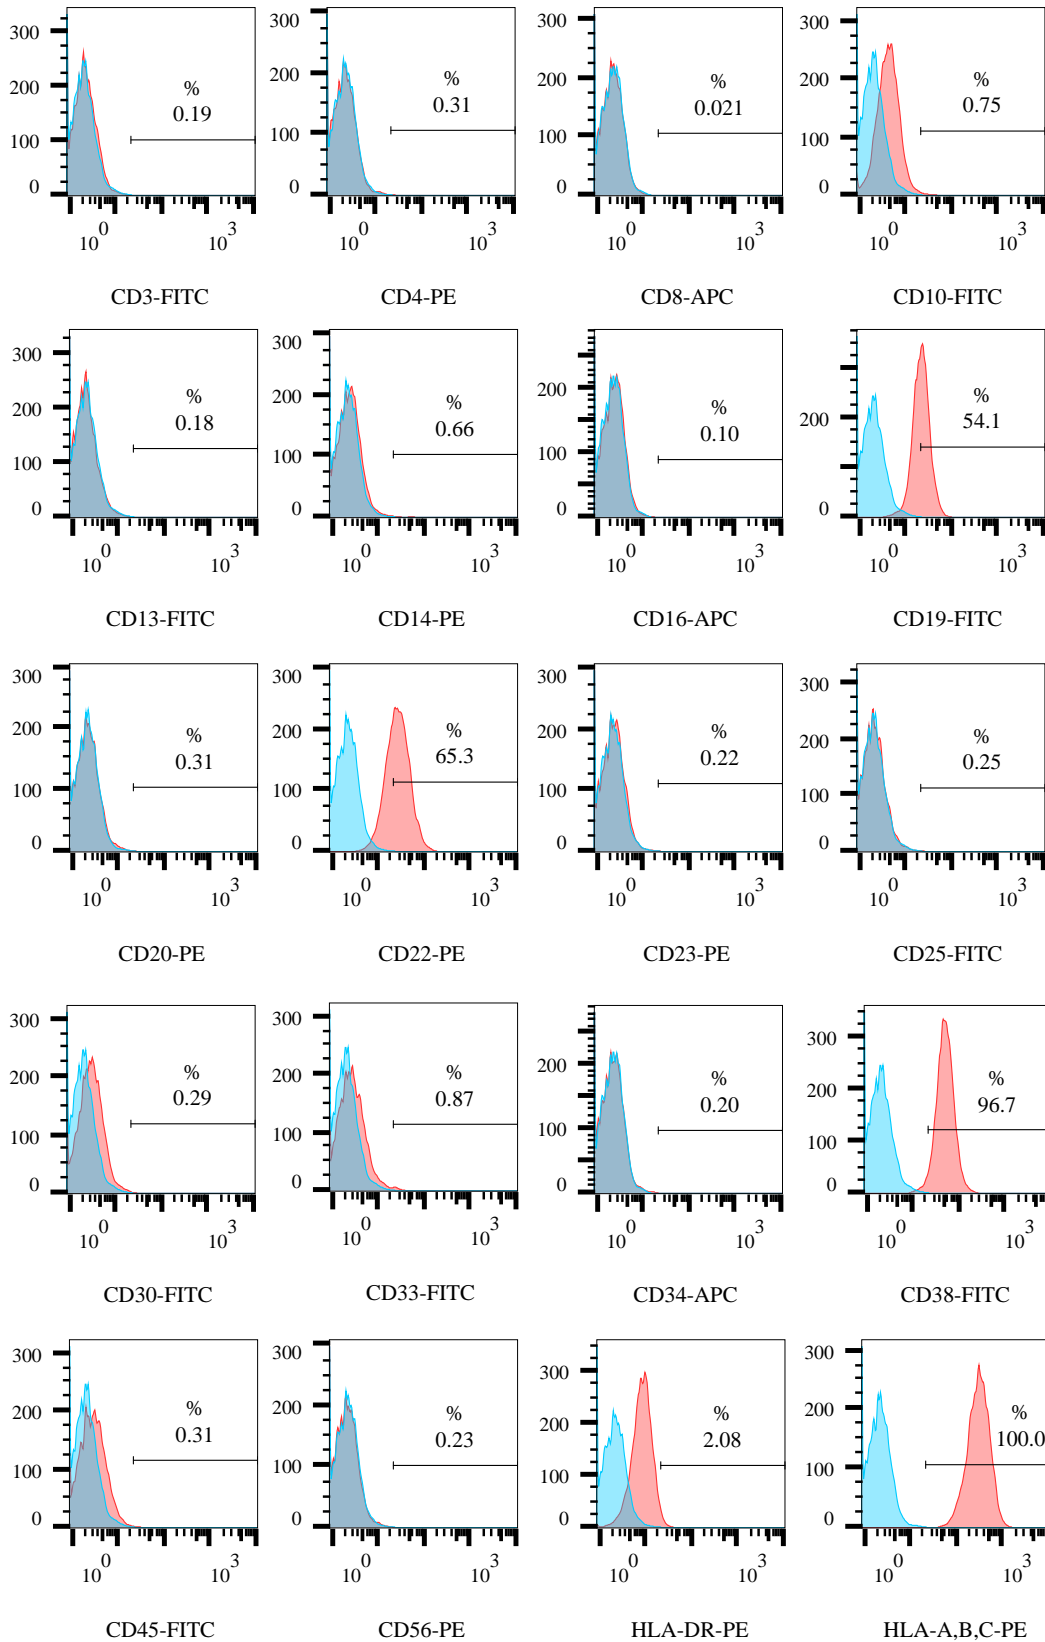

Figure S3H

Kasumi-8 (JCRB 1403) P9\*

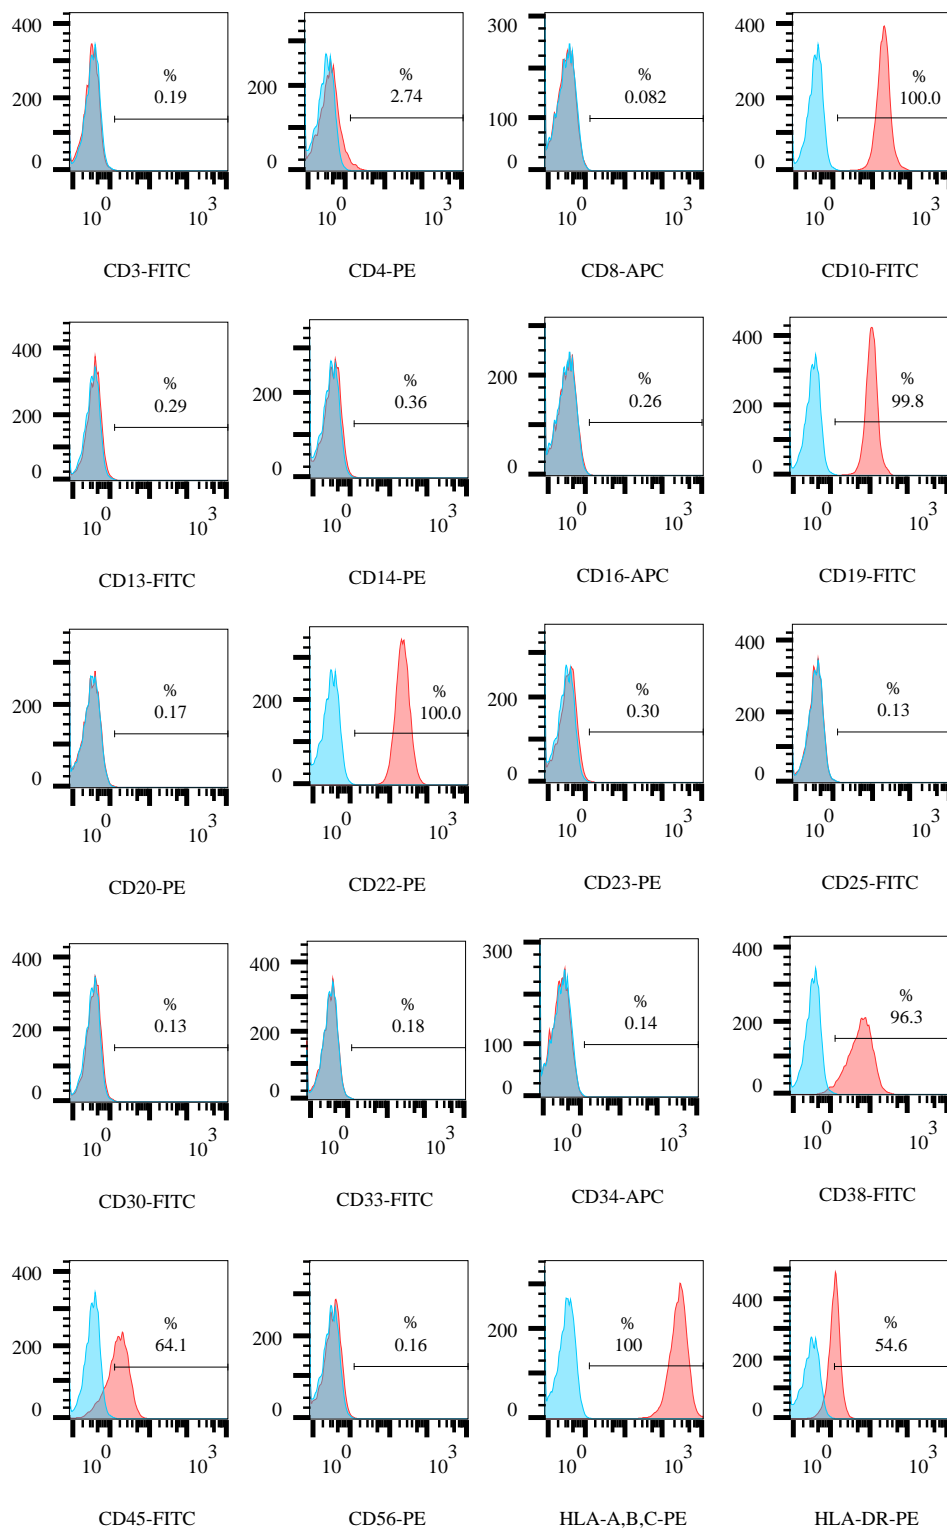

Figure S3I

Kasumi-9 (JCRB1409), P8\*

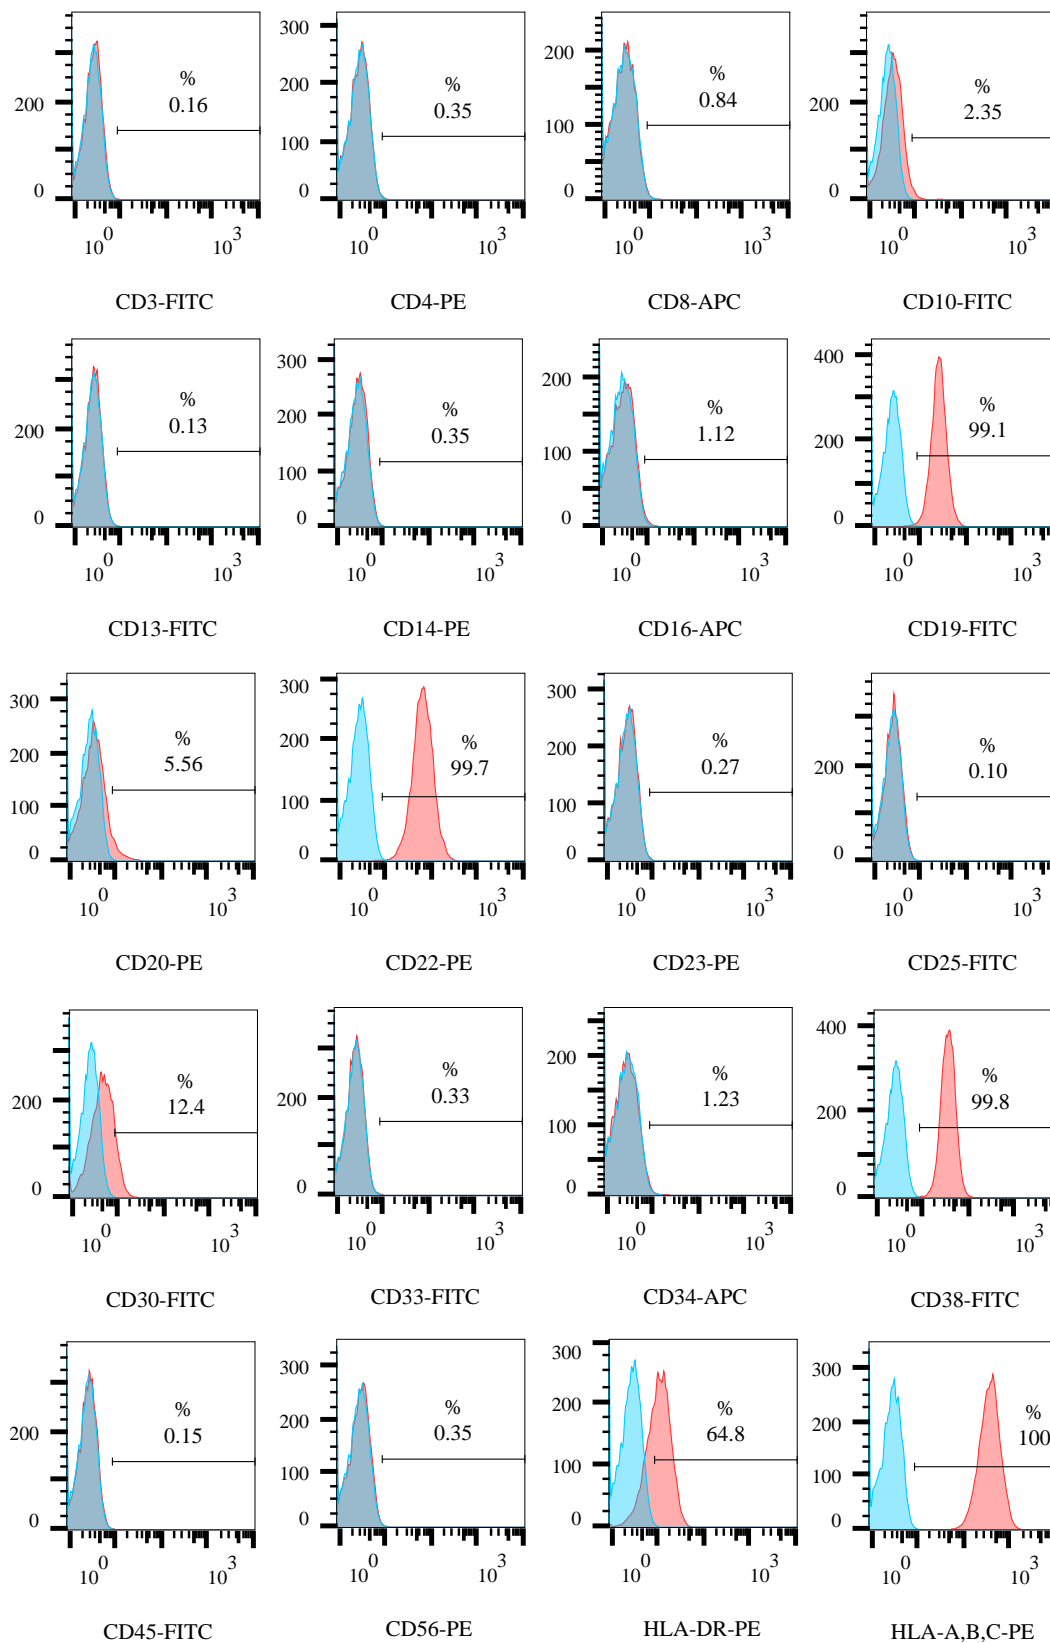

Figure S3J

Kasumi-10 (JCRB1410), P11\*

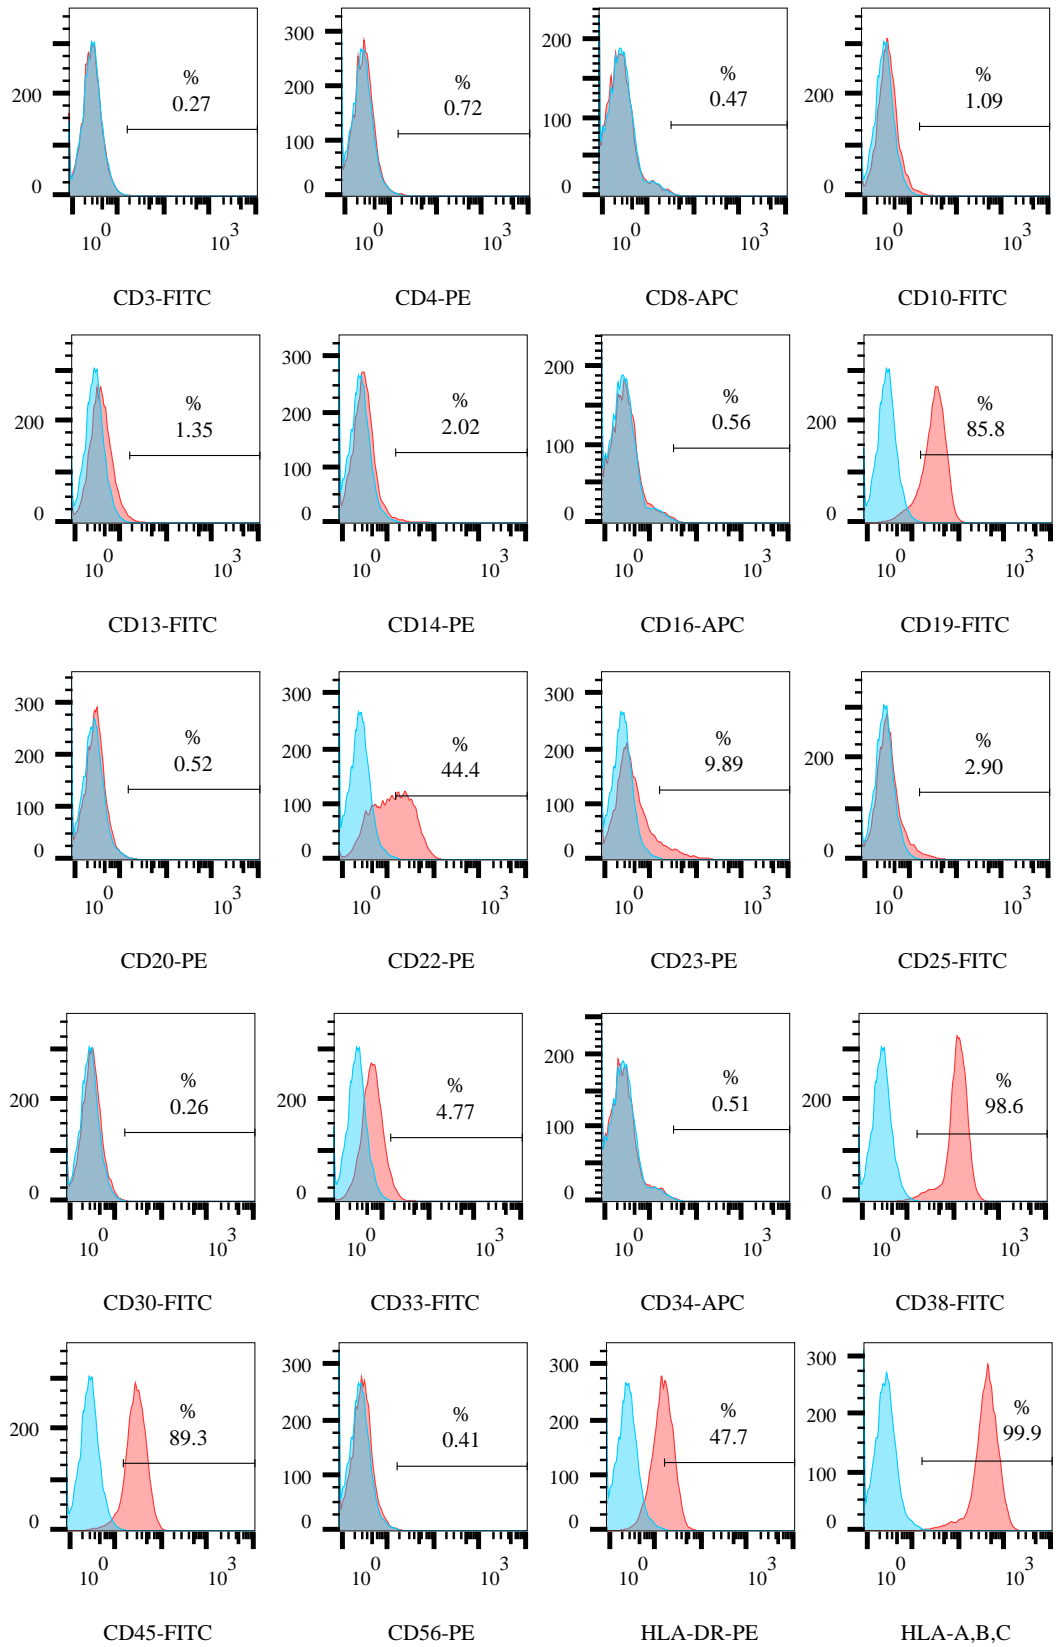

Table S1. Comparison of microarray data on Kasumi-1

| Report [reference]     | 2q gain | 5p gain    | 14q21.3 loss | 15q25.1 loss | 16q23.1 loss | Platform                 | Data            | Source        |
|------------------------|---------|------------|--------------|--------------|--------------|--------------------------|-----------------|---------------|
|                        |         |            |              |              |              |                          |                 |               |
| Pedranzini et al. [15] | -       | -          | -            | +            | +            | CGH Microarray, 244K     | Figure 4        | DSMZ          |
| Veigaard,Kjeldsen [16] | -       | -          | -            | -            | -            | Cytochip BAC array       | Table 1         | Not described |
| Peterson et al. [17]   | +       | +          | +            | -            | -            | Custom microarray, 180K  | Data Supplement | ATCC          |
| Present study          | +       | Low mosaic | Low mosaic   | +            | +            | CytoScan HD Array, 2670K | Figure S1, S2   | JCRB          |

Table S2. The list of FBS used for cell culture of Kasumi cell lines.

| Cell Name | Cell No. | LOT No.  | Passage Number* | FBS                         |           |           |
|-----------|----------|----------|-----------------|-----------------------------|-----------|-----------|
|           |          |          |                 | Manufacturer                | Catalog # | Lot #     |
| Kasumi-1  | JCRB1003 | 03232010 | P8*             | GIBCO                       | 10099     | 632877    |
|           |          | 09032015 | P8*             | GIBCO                       | 10091     | 8156160   |
|           |          | 02092018 | P8*             | Nichirei Bioscience (Sigma) | 172012    | 12J396    |
|           |          | 05112018 | P8*             | Nichirei Bioscience (Sigma) | 172012    | 12J396    |
| Kasumi-2  | JCRB1395 | 02152011 | P2*             | Sigma                       | F0926     | 027K03911 |
| Kasumi-3  | JCRB1004 | 11172010 | P15*            | GIBCO                       | 10099     | 632877    |
|           |          | 12032010 | P18*            | GIBCO                       | 10099     | 632877    |
|           |          | 04272016 | P19*            | GIBCO                       | 10091     | 8156160   |
| Kasumi-4  | JCRB0161 | 04282011 | P8*             | Sigma                       | F0926     | 027K03911 |
|           |          | 01122018 | P9*             | Nichirei Bioscience (Sigma) | 172012    | 12J396    |
| Kasumi-5  | JCRB1398 | 05172011 | P10*            | Sigma                       | F0926     | 027K03911 |
| Kasumi-6  | JCRB1024 | 10282013 | P9*             | Sigma                       | F0926     | 027K03911 |
|           |          | 11222013 | P14*            | Sigma                       | F0926     | 027K03911 |
|           |          | 04052017 | P6*             | Nichirei Bioscience (Sigma) | 172012    | 12J396    |
|           |          | 07022018 | P5*             | Nichirei Bioscience (Sigma) | 172012    | 12J396    |
| Kasumi-7  | JCRB1401 | 04122011 | P3*             | Sigma                       | F0926     | 027K03911 |
| Kasumi-8  | JCRB1403 | 05312011 | P6*             | Sigma                       | F0926     | 027K03911 |
| Kasumi-9  | JCRB1409 | 06032011 | P3*             | Sigma                       | F0926     | 027K03911 |
|           |          | 10252017 | P7*             | Nichirei Bioscience (Sigma) | 172012    | 12J396    |
| Kasumi-10 | JCRB1410 | 06132011 | P6*             | Sigma                       | F0926     | 027K03911 |
|           |          | 08272018 | P10*            | Nichirei Bioscience (Sigma) | 172012    | 12J396    |

\*Passage numbers accompanied with an asterisk indicate the numbers counted starting in the JCRB cell bank after the cells were deposited.



| Table S3. List of target genes in the IAD178152 On-Demand panel |            |               |             |               |              |                  |           |
|-----------------------------------------------------------------|------------|---------------|-------------|---------------|--------------|------------------|-----------|
| Name                                                            | Chromosome | Num_Amplicons | Total_Bases | Covered_Bases | Missed_Bases | Overall_Coverage | Num_Exons |
| ABCB1                                                           | chr7       | 34            | 4113        | 4113          | 0            | 1                | 27        |
| ABCG2                                                           | chr4       | 22            | 2118        | 2118          | 0            | 1                | 15        |
| ABL1                                                            | chr9       | 27            | 3649        | 3649          | 0            | 1                | 12        |
| ACOXL                                                           | chr2       | 18            | 2593        | 2593          | 0            | 1                | 17        |
| ACTA2                                                           | chr10      | 8             | 1214        | 1214          | 0            | 1                | 8         |
| AGO2                                                            | chr8       | 32            | 3530        | 3458          | 72           | 0.9796           | 19        |
| AICDA                                                           | chr12      | 6             | 847         | 847           | 0            | 1                | 5         |
| AKT1                                                            | chr14      | 17            | 1573        | 1573          | 0            | 1                | 13        |
| ALK                                                             | chr2       | 40            | 5153        | 5153          | 0            | 1                | 29        |
| ALOX5                                                           | chr10      | 25            | 2725        | 2725          | 0            | 1                | 14        |
| ANXA4                                                           | chr2       | 12            | 1566        | 1566          | 0            | 1                | 12        |
| ANXA5                                                           | chr4       | 13            | 1563        | 1563          | 0            | 1                | 12        |
| APC                                                             | chr5       | 61            | 8857        | 8857          | 0            | 1                | 16        |
| AQP9                                                            | chr15      | 10            | 1188        | 1188          | 0            | 1                | 6         |
| AR                                                              | chrX       | 20            | 2873        | 2873          | 0            | 1                | 9         |
| ARHGEF12                                                        | chr11      | 52            | 6685        | 6642          | 43           | 0.9936           | 41        |
| ARID5B                                                          | chr10      | 27            | 4121        | 4121          | 0            | 1                | 11        |
| ARL11                                                           | chr13      | 4             | 641         | 641           | 0            | 1                | 1         |
| ARNTL                                                           | chr11      | 19            | 2062        | 2062          | 0            | 1                | 17        |
| ASMTL                                                           | chrX       | 20            | 2516        | 2516          | 0            | 1                | 13        |
| ASXL1                                                           | chr20      | 33            | 4762        | 4762          | 0            | 1                | 13        |
| ATM                                                             | chr11      | 88            | 9791        | 9791          | 0            | 1                | 62        |
| ATP1B1                                                          | chr1       | 10            | 1212        | 1212          | 0            | 1                | 6         |
| ATRX                                                            | chrX       | 67            | 7829        | 7829          | 0            | 1                | 35        |
| BAALC                                                           | chr8       | 4             | 588         | 570           | 18           | 0.9694           | 3         |
| BACH2                                                           | chr6       | 18            | 2726        | 2726          | 0            | 1                | 4         |
| BAX                                                             | chr19      | 9             | 1149        | 1149          | 0            | 1                | 6         |
| BCL10                                                           | chr1       | 6             | 852         | 852           | 0            | 1                | 3         |
| BCL2                                                            | chr18      | 6             | 853         | 853           | 0            | 1                | 2         |
| BCOR                                                            | chrX       | 37            | 5408        | 5408          | 0            | 1                | 14        |
| BCORL1                                                          | chrX       | 37            | 5488        | 5488          | 0            | 1                | 13        |
| BCR                                                             | chr22      | 35            | 4966        | 4963          | 3            | 0.9994           | 23        |
| BIRC3                                                           | chr11      | 18            | 1895        | 1895          | 0            | 1                | 8         |
| BIRC5                                                           | chr17      | 7             | 851         | 750           | 101          | 0.8813           | 5         |
| BMP6                                                            | chr6       | 10            | 1612        | 1612          | 0            | 1                | 7         |
| BRAF                                                            | chr7       | 23            | 2481        | 2481          | 0            | 1                | 18        |
| C6orf10                                                         | chr6       | 35            | 3055        | 3055          | 0            | 1                | 26        |
| CAD                                                             | chr2       | 64            | 7118        | 7118          | 0            | 1                | 44        |
| CALR                                                            | chr19      | 12            | 1344        | 1344          | 0            | 1                | 9         |
| CAMK2D                                                          | chr4       | 27            | 2633        | 2633          | 0            | 1                | 21        |
| CARD11                                                          | chr7       | 35            | 3705        | 3705          | 0            | 1                | 24        |
| CASP7                                                           | chr10      | 17            | 1875        | 1875          | 0            | 1                | 10        |
| CASP8                                                           | chr2       | 14            | 1813        | 1813          | 0            | 1                | 10        |
| CBFB                                                            | chr16      | 6             | 655         | 655           | 0            | 1                | 6         |
| CBL                                                             | chr11      | 23            | 2881        | 2881          | 0            | 1                | 16        |
| CBLB                                                            | chr3       | 33            | 3849        | 3849          | 0            | 1                | 18        |

|        |       |    |      |      |   |        |    |
|--------|-------|----|------|------|---|--------|----|
| CCND1  | chr11 | 9  | 938  | 938  | 0 | 1      | 5  |
| CCR4   | chr3  | 6  | 1133 | 1133 | 0 | 1      | 1  |
| CCR7   | chr17 | 9  | 1287 | 1287 | 0 | 1      | 3  |
| CD28   | chr2  | 6  | 863  | 863  | 0 | 1      | 4  |
| CD44   | chr11 | 24 | 3183 | 3183 | 0 | 1      | 19 |
| CD5    | chr11 | 19 | 1988 | 1988 | 0 | 1      | 10 |
| CDH1   | chr16 | 22 | 2809 | 2809 | 0 | 1      | 16 |
| CDK6   | chr7  | 10 | 1331 | 1331 | 0 | 1      | 7  |
| CDKN2A | chr9  | 8  | 962  | 962  | 0 | 1      | 5  |
| CDKN2B | chr9  | 4  | 518  | 518  | 0 | 1      | 2  |
| CEBPE  | chr14 | 7  | 946  | 946  | 0 | 1      | 2  |
| CFLAR  | chr2  | 18 | 2418 | 2418 | 0 | 1      | 12 |
| CNOT3  | chr19 | 25 | 3112 | 3112 | 0 | 1      | 17 |
| CNR2   | chr1  | 7  | 1133 | 1133 | 0 | 1      | 1  |
| CREBBP | chr16 | 57 | 7639 | 7639 | 0 | 1      | 31 |
| CSF1R  | chr5  | 26 | 3129 | 3129 | 0 | 1      | 21 |
| CSF2   | chr5  | 4  | 635  | 635  | 0 | 1      | 4  |
| CSF3   | chr17 | 8  | 874  | 874  | 0 | 1      | 5  |
| CSF3R  | chr1  | 21 | 2857 | 2857 | 0 | 1      | 16 |
| CTCF   | chr16 | 17 | 2284 | 2284 | 0 | 1      | 10 |
| CTLA4  | chr2  | 6  | 872  | 872  | 0 | 1      | 4  |
| CTNNA1 | chr3  | 19 | 2486 | 2486 | 0 | 1      | 14 |
| CTSZ   | chr20 | 12 | 1212 | 1212 | 0 | 1      | 6  |
| CUX1   | chr7  | 61 | 7063 | 7054 | 9 | 0.9987 | 34 |
| CYP1A2 | chr15 | 14 | 1851 | 1851 | 0 | 1      | 6  |
| CYP1B1 | chr2  | 8  | 1652 | 1652 | 0 | 1      | 2  |
| CYP2C8 | chr10 | 16 | 1598 | 1598 | 0 | 1      | 10 |
| DAPK1  | chr9  | 40 | 5543 | 5543 | 0 | 1      | 25 |
| DCAF7  | chr17 | 10 | 1429 | 1429 | 0 | 1      | 8  |
| DDC    | chr7  | 19 | 2216 | 2216 | 0 | 1      | 14 |
| DDIT4  | chr10 | 5  | 799  | 799  | 0 | 1      | 2  |
| DDX41  | chr5  | 24 | 2719 | 2719 | 0 | 1      | 17 |
| DHODH  | chr16 | 13 | 1278 | 1278 | 0 | 1      | 9  |
| DNMT3A | chr2  | 29 | 3104 | 3104 | 0 | 1      | 24 |
| EGFR   | chr7  | 34 | 4189 | 4189 | 0 | 1      | 30 |
| ELAVL2 | chr9  | 11 | 1380 | 1380 | 0 | 1      | 6  |
| EPHB6  | chr7  | 31 | 3866 | 3866 | 0 | 1      | 16 |
| EPHX1  | chr1  | 15 | 1768 | 1768 | 0 | 1      | 8  |
| EPOR   | chr19 | 14 | 1927 | 1927 | 0 | 1      | 8  |
| ERBB2  | chr17 | 37 | 4080 | 4080 | 0 | 1      | 28 |
| ERBB4  | chr2  | 40 | 4207 | 4207 | 0 | 1      | 28 |
| ESR1   | chr6  | 15 | 1874 | 1874 | 0 | 1      | 8  |
| ETV6   | chr12 | 12 | 1439 | 1439 | 0 | 1      | 8  |
| EZH2   | chr7  | 24 | 2446 | 2446 | 0 | 1      | 19 |
| FAS    | chr10 | 10 | 1098 | 1098 | 0 | 1      | 9  |
| FBXW7  | chr4  | 23 | 2692 | 2692 | 0 | 1      | 13 |
| FGF1   | chr5  | 5  | 618  | 618  | 0 | 1      | 3  |
| FGFR1  | chr8  | 24 | 2825 | 2825 | 0 | 1      | 19 |

|          |       |    |      |      |    |        |    |
|----------|-------|----|------|------|----|--------|----|
| FGFR2    | chr10 | 25 | 2910 | 2910 | 0  | 1      | 20 |
| FGFR3    | chr4  | 26 | 2752 | 2752 | 0  | 1      | 18 |
| FHL2     | chr2  | 9  | 1090 | 1090 | 0  | 1      | 5  |
| FIP1L1   | chr4  | 26 | 2762 | 2720 | 42 | 0.9848 | 19 |
| FLT3     | chr13 | 28 | 3222 | 3222 | 0  | 1      | 24 |
| FUS      | chr16 | 17 | 1731 | 1731 | 0  | 1      | 15 |
| FXYD6    | chr11 | 7  | 588  | 588  | 0  | 1      | 6  |
| FYN      | chr6  | 18 | 2370 | 2370 | 0  | 1      | 12 |
| GATA1    | chrX  | 12 | 1292 | 1292 | 0  | 1      | 5  |
| GATA2    | chr3  | 13 | 1493 | 1493 | 0  | 1      | 5  |
| GATA3    | chr10 | 12 | 1385 | 1385 | 0  | 1      | 5  |
| GLI1     | chr12 | 24 | 3871 | 3871 | 0  | 1      | 11 |
| GLI2     | chr2  | 33 | 4891 | 4891 | 0  | 1      | 13 |
| GNA11    | chr19 | 12 | 1150 | 1138 | 12 | 0.9896 | 7  |
| GNAQ     | chr9  | 9  | 1150 | 1150 | 0  | 1      | 7  |
| GNAS     | chr20 | 36 | 4801 | 4801 | 0  | 1      | 16 |
| GSTK1    | chr7  | 9  | 1199 | 1199 | 0  | 1      | 7  |
| GSTM1    | chr1  | 9  | 1057 | 1057 | 0  | 1      | 8  |
| GSTO1    | chr10 | 9  | 1026 | 1026 | 0  | 1      | 6  |
| GSTP1    | chr11 | 10 | 983  | 983  | 0  | 1      | 7  |
| HCK      | chr20 | 20 | 2283 | 2283 | 0  | 1      | 14 |
| HGF      | chr7  | 24 | 2393 | 2378 | 15 | 0.9937 | 19 |
| HLA-DQA1 | chr6  | 8  | 968  | 953  | 15 | 0.9845 | 4  |
| HMGA2    | chr12 | 9  | 1072 | 1058 | 14 | 0.9869 | 8  |
| HNFI1A   | chr12 | 16 | 2017 | 2017 | 0  | 1      | 10 |
| HOXD4    | chr2  | 7  | 868  | 868  | 0  | 1      | 2  |
| HRAS     | chr11 | 5  | 683  | 683  | 0  | 1      | 5  |
| HSPA5    | chr9  | 15 | 2365 | 2338 | 27 | 0.9886 | 8  |
| HSPB1    | chr7  | 7  | 768  | 768  | 0  | 1      | 3  |
| ICOS     | chr2  | 7  | 850  | 850  | 0  | 1      | 5  |
| IDH1     | chr2  | 12 | 1325 | 1325 | 0  | 1      | 8  |
| IDH2     | chr15 | 15 | 1469 | 1469 | 0  | 1      | 11 |
| IFI30    | chr19 | 10 | 1103 | 1103 | 0  | 1      | 7  |
| IFNA2    | chr9  | 3  | 617  | 617  | 0  | 1      | 1  |
| IFNG     | chr12 | 4  | 541  | 541  | 0  | 1      | 4  |
| IKZF1    | chr7  | 16 | 2029 | 2029 | 0  | 1      | 9  |
| IKZF3    | chr17 | 13 | 1930 | 1930 | 0  | 1      | 8  |
| IL10     | chr1  | 5  | 787  | 787  | 0  | 1      | 5  |
| IL17A    | chr6  | 5  | 618  | 618  | 0  | 1      | 3  |
| IL19     | chr1  | 8  | 948  | 948  | 0  | 1      | 6  |
| IL2      | chr4  | 7  | 662  | 662  | 0  | 1      | 4  |
| IL4      | chr5  | 6  | 662  | 662  | 0  | 1      | 4  |
| IL6      | chr7  | 7  | 839  | 839  | 0  | 1      | 5  |
| IL7R     | chr5  | 11 | 1460 | 1460 | 0  | 1      | 8  |
| IRF4     | chr6  | 12 | 1436 | 1436 | 0  | 1      | 8  |
| IRF8     | chr16 | 14 | 1681 | 1681 | 0  | 1      | 8  |
| ITGA4    | chr2  | 42 | 4581 | 4581 | 0  | 1      | 29 |
| ITGAM    | chr16 | 40 | 4962 | 4962 | 0  | 1      | 30 |

|        |       |     |       |       |    |        |    |
|--------|-------|-----|-------|-------|----|--------|----|
| JAK2   | chr9  | 31  | 3629  | 3629  | 0  | 1      | 23 |
| JAK3   | chr19 | 33  | 3605  | 3605  | 0  | 1      | 23 |
| KANSL1 | chr17 | 29  | 4018  | 4018  | 0  | 1      | 14 |
| KDM6A  | chrX  | 45  | 4662  | 4662  | 0  | 1      | 30 |
| KDR    | chr4  | 34  | 4371  | 4371  | 0  | 1      | 30 |
| KEL    | chr7  | 24  | 3149  | 3149  | 0  | 1      | 19 |
| KIT    | chr4  | 24  | 3141  | 3141  | 0  | 1      | 21 |
| KMT2A  | chr11 | 79  | 12279 | 12279 | 0  | 1      | 36 |
| KMT2C  | chr7  | 124 | 17686 | 17642 | 44 | 0.9975 | 59 |
| KMT2E  | chr7  | 49  | 6827  | 6827  | 0  | 1      | 25 |
| KRAS   | chr12 | 6   | 737   | 737   | 0  | 1      | 5  |
| LMO1   | chr11 | 8   | 743   | 743   | 0  | 1      | 5  |
| LPAR1  | chr9  | 8   | 1245  | 1245  | 0  | 1      | 3  |
| LPP    | chr3  | 16  | 2289  | 2289  | 0  | 1      | 9  |
| MAP2K1 | chr15 | 12  | 1292  | 1292  | 0  | 1      | 11 |
| MECOM  | chr3  | 33  | 4626  | 4626  | 0  | 1      | 18 |
| MET    | chr7  | 33  | 4427  | 4427  | 0  | 1      | 20 |
| MGMT   | chr10 | 6   | 967   | 967   | 0  | 1      | 5  |
| MLH1   | chr3  | 21  | 2461  | 2461  | 0  | 1      | 19 |
| MLLT3  | chr9  | 19  | 2310  | 2310  | 0  | 1      | 12 |
| MPL    | chr1  | 16  | 2028  | 2028  | 0  | 1      | 12 |
| MTAP   | chr9  | 9   | 1252  | 1252  | 0  | 1      | 8  |
| MTHFR  | chr1  | 17  | 2081  | 2081  | 0  | 1      | 11 |
| MTOR   | chr1  | 67  | 8220  | 8220  | 0  | 1      | 57 |
| MTRR   | chr5  | 18  | 2328  | 2279  | 49 | 0.979  | 15 |
| MX1    | chr21 | 22  | 2532  | 2532  | 0  | 1      | 13 |
| MYB    | chr6  | 23  | 3086  | 3086  | 0  | 1      | 16 |
| MYC    | chr8  | 9   | 1395  | 1395  | 0  | 1      | 3  |
| MYD88  | chr3  | 9   | 1004  | 1004  | 0  | 1      | 5  |
| MYH11  | chr16 | 51  | 6391  | 6391  | 0  | 1      | 42 |
| NAT2   | chr8  | 5   | 923   | 923   | 0  | 1      | 1  |
| NCOA3  | chr20 | 40  | 5355  | 5324  | 31 | 0.9942 | 21 |
| NF1    | chr17 | 74  | 9161  | 9161  | 0  | 1      | 58 |
| NOTCH1 | chr9  | 63  | 8008  | 7987  | 21 | 0.9974 | 34 |
| NPM1   | chr5  | 12  | 1014  | 1014  | 0  | 1      | 12 |
| NQO1   | chr16 | 7   | 1125  | 1125  | 0  | 1      | 6  |
| NRAS   | chr1  | 5   | 610   | 610   | 0  | 1      | 4  |
| NSD1   | chr5  | 57  | 8311  | 8311  | 0  | 1      | 22 |
| NT5C2  | chr10 | 22  | 2536  | 2536  | 0  | 1      | 17 |
| NTRK3  | chr15 | 30  | 3774  | 3774  | 0  | 1      | 20 |
| OPRM1  | chr6  | 22  | 2835  | 2835  | 0  | 1      | 14 |
| P2RX7  | chr12 | 17  | 2438  | 2438  | 0  | 1      | 13 |
| PAX5   | chr9  | 16  | 1707  | 1707  | 0  | 1      | 10 |
| PDE4B  | chr1  | 28  | 3577  | 3577  | 0  | 1      | 19 |
| PDGFRA | chr4  | 27  | 3490  | 3490  | 0  | 1      | 22 |
| PDGFRB | chr5  | 37  | 3541  | 3541  | 0  | 1      | 22 |
| PER1   | chr17 | 38  | 4973  | 4973  | 0  | 1      | 22 |
| PER2   | chr2  | 37  | 4868  | 4868  | 0  | 1      | 22 |

|          |       |    |      |      |    |        |    |
|----------|-------|----|------|------|----|--------|----|
| PER3     | chr1  | 37 | 4683 | 4683 | 0  | 1      | 21 |
| PHF11    | chr13 | 13 | 1496 | 1496 | 0  | 1      | 10 |
| PHF6     | chrX  | 12 | 1293 | 1293 | 0  | 1      | 9  |
| PICALM   | chr11 | 29 | 3033 | 3033 | 0  | 1      | 21 |
| PIK3CA   | chr3  | 28 | 3407 | 3407 | 0  | 1      | 20 |
| PIP4K2A  | chr10 | 14 | 1721 | 1721 | 0  | 1      | 10 |
| PLCG1    | chr20 | 43 | 4196 | 4196 | 0  | 1      | 32 |
| PMAIP1   | chr18 | 2  | 265  | 265  | 0  | 1      | 2  |
| PML      | chr15 | 30 | 4208 | 4208 | 0  | 1      | 11 |
| POLB     | chr8  | 16 | 1708 | 1708 | 0  | 1      | 14 |
| POT1     | chr7  | 25 | 2655 | 2655 | 0  | 1      | 15 |
| PRKAR1A  | chr17 | 13 | 1297 | 1297 | 0  | 1      | 11 |
| PRKCB    | chr16 | 22 | 3075 | 3034 | 41 | 0.9867 | 18 |
| PRPF8    | chr17 | 68 | 9108 | 9108 | 0  | 1      | 42 |
| PRSS1    | chr7  | 7  | 794  | 794  | 0  | 1      | 5  |
| PSIP1    | chr9  | 23 | 2481 | 2440 | 41 | 0.9835 | 17 |
| PTEN     | chr10 | 15 | 1831 | 1831 | 0  | 1      | 10 |
| PTGS2    | chr1  | 18 | 1915 | 1915 | 0  | 1      | 10 |
| PTPN11   | chr12 | 16 | 1936 | 1936 | 0  | 1      | 15 |
| PTPN2    | chr18 | 17 | 2012 | 2012 | 0  | 1      | 12 |
| PTPRJ    | chr11 | 40 | 5319 | 5305 | 14 | 0.9974 | 26 |
| PXDN     | chr2  | 40 | 5590 | 5590 | 0  | 1      | 23 |
| PYGL     | chr14 | 25 | 3344 | 3344 | 0  | 1      | 20 |
| RAC2     | chr22 | 9  | 879  | 879  | 0  | 1      | 6  |
| RAD21    | chr8  | 19 | 2026 | 2026 | 0  | 1      | 13 |
| RARA     | chr17 | 16 | 2002 | 2002 | 0  | 1      | 9  |
| RASGRP1  | chr15 | 26 | 3244 | 3244 | 0  | 1      | 17 |
| RB1      | chr13 | 31 | 3057 | 3057 | 0  | 1      | 27 |
| RBM15    | chr1  | 18 | 3131 | 3131 | 0  | 1      | 3  |
| RET      | chr10 | 27 | 3577 | 3577 | 0  | 1      | 20 |
| RGS2     | chr1  | 6  | 886  | 886  | 0  | 1      | 5  |
| RNASEH2B | chr13 | 14 | 1572 | 1572 | 0  | 1      | 12 |
| RPL10    | chrX  | 8  | 1114 | 1114 | 0  | 1      | 6  |
| RPL5     | chr1  | 12 | 1294 | 1294 | 0  | 1      | 8  |
| RUNX1    | chr21 | 14 | 1578 | 1578 | 0  | 1      | 9  |
| RUNX3    | chr1  | 13 | 1606 | 1606 | 0  | 1      | 6  |
| SEPT9    | chr17 | 26 | 3072 | 3072 | 0  | 1      | 16 |
| SETBP1   | chr18 | 30 | 5040 | 5040 | 0  | 1      | 6  |
| SETD2    | chr3  | 53 | 7905 | 7899 | 6  | 0.9992 | 21 |
| SETDB2   | chr13 | 23 | 2860 | 2850 | 10 | 0.9965 | 14 |
| SF3B1    | chr2  | 43 | 4245 | 4245 | 0  | 1      | 26 |
| SGK1     | chr6  | 21 | 2785 | 2785 | 0  | 1      | 17 |
| SH2B3    | chr12 | 17 | 1934 | 1934 | 0  | 1      | 8  |
| SH3GL1   | chr19 | 17 | 1607 | 1607 | 0  | 1      | 10 |
| SLC19A1  | chr21 | 18 | 2372 | 2372 | 0  | 1      | 7  |
| SLC24A2  | chr9  | 17 | 2486 | 2486 | 0  | 1      | 10 |
| SMAD4    | chr18 | 18 | 1769 | 1769 | 0  | 1      | 11 |
| SMARCB1  | chr22 | 10 | 1302 | 1302 | 0  | 1      | 9  |

|           |       |    |       |       |    |        |    |
|-----------|-------|----|-------|-------|----|--------|----|
| SMC1A     | chrX  | 35 | 4005  | 4005  | 0  | 1      | 26 |
| SMC3      | chr10 | 41 | 3944  | 3944  | 0  | 1      | 29 |
| SMO       | chr7  | 23 | 2484  | 2484  | 0  | 1      | 12 |
| SP110     | chr2  | 22 | 3220  | 3220  | 0  | 1      | 20 |
| SPARC     | chr5  | 11 | 1478  | 1478  | 0  | 1      | 9  |
| SPII      | chr11 | 10 | 1066  | 1066  | 0  | 1      | 5  |
| SPRY4     | chr5  | 7  | 1049  | 1049  | 0  | 1      | 2  |
| SRC       | chr20 | 13 | 1721  | 1721  | 0  | 1      | 11 |
| SRSF2     | chr17 | 6  | 686   | 686   | 0  | 1      | 2  |
| SRY       | chrY  | 6  | 625   | 625   | 0  | 1      | 1  |
| STAG2     | chrX  | 46 | 4137  | 4117  | 20 | 0.9952 | 33 |
| STAT3     | chr17 | 25 | 2543  | 2543  | 0  | 1      | 23 |
| STAT5B    | chr17 | 20 | 2544  | 2501  | 43 | 0.9831 | 18 |
| STK11     | chr19 | 11 | 1392  | 1392  | 0  | 1      | 9  |
| SVIL      | chr10 | 55 | 6995  | 6995  | 0  | 1      | 35 |
| SYNGR1    | chr22 | 12 | 1197  | 1197  | 0  | 1      | 6  |
| TAL1      | chr1  | 8  | 1146  | 1146  | 0  | 1      | 3  |
| TBL1XR1   | chr3  | 18 | 2245  | 2245  | 0  | 1      | 14 |
| TCF3      | chr19 | 26 | 3142  | 3142  | 0  | 1      | 19 |
| TERT      | chr5  | 29 | 3559  | 3559  | 0  | 1      | 16 |
| TET2      | chr4  | 37 | 6188  | 6188  | 0  | 1      | 9  |
| TFRC      | chr3  | 26 | 3003  | 2993  | 10 | 0.9967 | 18 |
| TGM6      | chr20 | 24 | 2771  | 2771  | 0  | 1      | 13 |
| THBD      | chr20 | 10 | 1738  | 1738  | 0  | 1      | 1  |
| TLX1      | chr10 | 8  | 1037  | 1037  | 0  | 1      | 4  |
| TNFRSF11A | chr18 | 17 | 2351  | 2351  | 0  | 1      | 10 |
| TNFSF10   | chr3  | 8  | 1212  | 1212  | 0  | 1      | 6  |
| TNFSF11   | chr13 | 10 | 1204  | 1204  | 0  | 1      | 5  |
| TOP2A     | chr17 | 50 | 6346  | 6338  | 8  | 0.9987 | 35 |
| TOPBP1    | chr3  | 51 | 5919  | 5919  | 0  | 1      | 27 |
| TP53      | chr17 | 12 | 1383  | 1383  | 0  | 1      | 12 |
| TP63      | chr3  | 22 | 2360  | 2360  | 0  | 1      | 16 |
| TP73      | chr1  | 25 | 2650  | 2650  | 0  | 1      | 14 |
| TRH       | chr3  | 6  | 829   | 829   | 0  | 1      | 2  |
| TRIO      | chr5  | 96 | 12144 | 12144 | 0  | 1      | 57 |
| TRPV5     | chr7  | 23 | 2940  | 2940  | 0  | 1      | 15 |
| TSC2      | chr16 | 45 | 5834  | 5834  | 0  | 1      | 41 |
| U2AF1     | chr21 | 10 | 880   | 880   | 0  | 1      | 9  |
| UMPS      | chr3  | 12 | 1503  | 1503  | 0  | 1      | 6  |
| VDR       | chr12 | 14 | 1534  | 1534  | 0  | 1      | 10 |
| VHL       | chr3  | 4  | 672   | 672   | 0  | 1      | 3  |
| VPREB1    | chr22 | 4  | 549   | 549   | 0  | 1      | 2  |
| VSIG4     | chrX  | 13 | 1736  | 1736  | 0  | 1      | 9  |
| WHSC1     | chr4  | 38 | 5270  | 5226  | 44 | 0.9917 | 22 |
| WT1       | chr11 | 13 | 1674  | 1674  | 0  | 1      | 11 |
| XRCC1     | chr19 | 22 | 2752  | 2752  | 0  | 1      | 17 |
| ZBTB16    | chr11 | 13 | 2082  | 2082  | 0  | 1      | 6  |
| ZRSR2     | chrX  | 17 | 1559  | 1559  | 0  | 1      | 11 |

Table S4. Filter settings for variant analysis

|                        |                                                                                                                                                                                                                       |
|------------------------|-----------------------------------------------------------------------------------------------------------------------------------------------------------------------------------------------------------------------|
| Allele Frequency       | $\geq 0.1$                                                                                                                                                                                                            |
| Allele Read-Count      | $\geq 10$                                                                                                                                                                                                             |
| Filtered Coverage      | $\geq 20$                                                                                                                                                                                                             |
| PValue                 | $\leq 0.01$                                                                                                                                                                                                           |
| Minor Allele Frequency | $\leq 1.0E-6$                                                                                                                                                                                                         |
| UCSC Common SNPs       | Not In                                                                                                                                                                                                                |
| Location in            | exonic                                                                                                                                                                                                                |
| Variant Effect in      | unknown,<br>missense,<br>nonframeshiftInsertion,<br>nonframeshiftDeletion,<br>nonframeshiftBlockSubstitution,<br>nonsense,<br>stoploss,<br>frameshiftInsertion,<br>frameshiftDeletion,<br>frameshiftBlockSubstitution |

Table S5. Cell surface markers used for flow cytometry

|         |        |      |                 |             |
|---------|--------|------|-----------------|-------------|
| CD3     | mIgG1  | FITC | DAKO            | F0818       |
| CD4     | mIgG1  | RPE  | Miltenyi Biotec | 130-091-231 |
| CD8     | mIgG1  | APC  | DAKO            | C7227       |
| CD10    | mIgG1  | FITC | DAKO            | F0826       |
| CD13    | mIgG1  | FITC | Beckman coulter | IM0778U     |
| CD14    | mIgG1  | RPE  | Biolegend       | 325606      |
| CD16    | mIgG1  | APC  | Biolegend       | 302012      |
| CD19    | mIgG1  | FITC | Beckman coulter | A07768      |
| CD20    | mIgG2a | RPE  | Beckman coulter | IM1451      |
| CD22    | mIgG1  | RPE  | DAKO            | R7061       |
| CD23    | mIgG1  | RPE  | DAKO            | R7108       |
| CD25    | mIgG1  | FITC | DAKO            | F0801       |
| CD30    | mIgG1  | FITC | DAKO            | F0849       |
| CD33    | mIgG1  | FITC | DAKO            | F0832       |
| CD34    | mIgG1  | APC  | BD              | 555824      |
| CD38    | mIgG1  | FITC | DAKO            | F7101       |
| CD45    | mIgG1  | FITC | DAKO            | F0861       |
| CD56    | mIgG1  | RPE  | DAKO            | R7127       |
| HLA-ABC | mIgG2a | RPE  | DAKO            | R7000       |
| HLA-DR  | mIgG1  | RPE  | Beckman coulter | IM1639      |

**Isotype Control**

|                          |  |          |                 |        |
|--------------------------|--|----------|-----------------|--------|
| mIgG1-RPE                |  | RPE      | DAKO            | X0928  |
| mIgG1-APC                |  | APC      | DAKO            | X0968  |
| mIgG1-FITC<br>/mIgG2a-PE |  | FITC/RPE | Beckman coulter | A10974 |



Table S6. Alterations detected by SNP microarray analysis. UPD is shown by 'hmz'.

| Cell name | Microarray Nomenclature (ISCN 2016)                                                                                                                                                                                                                                                                                                                                                                                                                                                                                                                                                                                                                                                                                                                                                                                                                                               |
|-----------|-----------------------------------------------------------------------------------------------------------------------------------------------------------------------------------------------------------------------------------------------------------------------------------------------------------------------------------------------------------------------------------------------------------------------------------------------------------------------------------------------------------------------------------------------------------------------------------------------------------------------------------------------------------------------------------------------------------------------------------------------------------------------------------------------------------------------------------------------------------------------------------|
| Kasumi-1  | arr[GRCh37] 2q21.2q33.2(134906897_204341630)x3,<br>2q33.2q37.3(204342206_242783384)x1,<br>3q13.2q13.31(112925604_114196637)x3,<br>4p12q12(46448124_54252935)x3,<br>4q12q13.1(54280345_61623168)x4,<br>7p22.3p15.3(43360_21026663)x1,<br>7p15.3p11.2(21027147_56867109)x3,<br>8q24.13q24.3(123703307_146295771)x4,<br>9p24.3p21.1(203861_29309020)x1,<br>9q21.11q34.3(71013799_141025328)x2 hmz,<br>10p15.3q26.3(142391_135427143)x3,<br>11p15.5(230615_2216183)x3,<br>12p13.33p12.3(328575_16749621)x1,<br>12p12.3(16749917_18896560)x4,<br>13q11q14.11(19436286_41586054)x1,<br>15q11.2q13.1(22770421_28958779)x1,<br>15q13.1q15.1(29904016_41159484)x1,<br>15q15.1q21.1(41585042_46668187)x1,<br>16p13.3p11.2(85880_31704526)x1,<br>17p13.3p11.1(525_22261792)x1,<br>17q21.32q22(45417166_53812743)x3,<br>17q22q25.3(56714637_81041938)x3,<br>Yq11.22q11.23(2911032_28758192)x0 |
| Kasumi-2  | arr[GRCh37] 1q23.3q44(164750227_249206020)x3,<br>2p23.1p22.3(30437776_33815335)x1,<br>3q26.33q28(179241427_191569581)x1,<br>6q13q22.32(73706990_126760994)x1,<br>7p22.3p11.2(65518_56859247)x1,<br>7q11.21q36.3(62461703_159119707)x3,<br>14q21.2q21.3(45288494_48246084)x1,<br>14q32.11q32.12(90795952_94583037)x1,<br>18q21.2(48781784_50021501)x1,<br>18q22.1q22.3(66383450_69619596)x1,<br>19p13.3(260911_1505683)x1,<br>Yq11.22q11.23(21945977_28411412)x0.3                                                                                                                                                                                                                                                                                                                                                                                                                 |
| Kasumi-3  | arr[GRCh37] 1p22.1q24.2 (94506190_169477574)x2 hmz,<br>2p22.2p22.1(38537295_40337861)x1,<br>2p16.3(50526394_51929660)x1,<br>3p21.31(46968022_49081686)x1,<br>4q28.2q28.3(130325593_138049181)x2 hmz,<br>5q14.2q33.3(81970366_156449748)x1,<br>5q34q35.3(160353682_180719789)x1,<br>6p25.3p24.3(184718_8932296)x2 hmz,<br>6p21.32p21.1(32194594_40702622)x2 hmz,<br>7p22.3p15.2(2391884_26518563)x1,<br>7q34q36.1(142453878_149068732)x1,<br>9q32q33.2(115117675_123845745)x1,<br>10q21.3q26.3(66237714_135427143)x3,<br>10q25.3q26.13(114938716_125649795)x3 hmz,<br>11p15.2p15.1(13625302_21620047)x2 hmz,<br>12p13.2p11.23(11649731_27103020)x1,                                                                                                                                                                                                                                |

|           |                                                                                                                                                                                                                                                                                                                                                                                                                                                                                                                                                                                                         |
|-----------|---------------------------------------------------------------------------------------------------------------------------------------------------------------------------------------------------------------------------------------------------------------------------------------------------------------------------------------------------------------------------------------------------------------------------------------------------------------------------------------------------------------------------------------------------------------------------------------------------------|
|           | 12q15q24.32(67980090_127953657)x2 hmz<br>15q11.2q14(22752398_35000987)x2 hmz,<br>16p12.3p12.1(17842757_26812386)x2 hmz,<br>16p11.2(32027964_33781862)x3,<br>16q12.1q13(49695329_57395986)x2 hmz,<br>17p13.3p13.1(2997488_9177221)x2 hmz,<br>20p12.1q12(15813474_40180864)x2 hmz,<br>20q12q13.2(40180865_50663210)x1                                                                                                                                                                                                                                                                                     |
| Kasumi-5  | arr[GRCh37] 3p26.3p21.31(62613_48392800)x2 hmz,<br>6q24.2q25.3(143499742_159935292)x1,<br>12p13.33p11.23(191242_26878543)x1,<br>17p13.3q21.31 (525_41399644)x1,<br>20p13p11.21 (61568_25281959)x3,                                                                                                                                                                                                                                                                                                                                                                                                      |
| Kasumi-6  | arr[GRCh37] 1p22.1p21.2(94599283_99969159)x2 hmz,<br>2p24.2q12.1(19166927_105885194)x2 hmz,<br>2q14.3q22.1(124153065_137708701)x2 hmz<br>2q31.1(169748842_176159665)x2 hmz,<br>3p21.31p21.1(47759417_53175017)x2 hmz,<br>3q24q29(144589692_197851986)x3,<br>10p15.3 q26.3 (100026_135427143)x3,<br>11p13q12.1(33966694_58598012)x2 hmz,<br>12p13.33p11.1(173786_34835837)x1,<br>13q11q22.1(19436286_74500228)x3,<br>13q22.1q34(74910513_115107733)x4<br>17p13.3p11.2(525_21555368)x1,<br>19p13.3p11(260911_24505637)x2 hmz,<br>21q11.2q22.3(15006457_48097372)x3,<br>22q11.1q13.33(16888899_51197838)x3 |
| Kasumi-7  | arr[GRCh37] 1q32.1q41(205609009_215244510)x2 hmz,<br>4q12q13.1(59030168_66080253)x1,<br>4q13.2(67652806_69051094)x1,<br>4q13.2q13.3(70465736_72651433)x1,<br>4q13.3(73090506_75752089)x1,<br>4q22.2q22.3(94954025_98481870)x1,<br>8q11.1q11.21(47189058_48400130)x3,<br>9p22.2p21.2(18061139_26349225)x1,<br>9p24.1p23(4758060_9476653)x1,<br>9q21.11q21.13(70989957_78456306)x1,<br>9q32q33.2(116141808_122970210)x1                                                                                                                                                                                   |
| Kasumi-8  | arr[GRCh37] 9p22.1q13(19516862_67983174)x1,<br>9p22.3p22.2(15227687_16986789)x1,<br>17p13.2p12(4438906_12861563)x1,<br>19p13.3(1902841_4014482)x1,<br>20q12q13.2(38759789_51606561)x1                                                                                                                                                                                                                                                                                                                                                                                                                   |
| Kasumi-9  | arr[GRCh37] 5q11.1q11.2(49843246_51972210)x1,<br>5q31.3q33.2(141034183_155590271)x1,<br>9p21.1(30992687_32211763)x1,<br>9p23p21.1(9074934_29871355)x1,<br>9q22.31q32(96353484_115939209)x1.3,<br>18q21.31q21.33(55881149_60067241)x1.3,<br>19p13.11q12(16958954_29599139)x2 hmz                                                                                                                                                                                                                                                                                                                         |
| Kasumi-10 | arr[GRCh37] 16p12.1q12.1(25490344_51698586)x2 hmz,                                                                                                                                                                                                                                                                                                                                                                                                                                                                                                                                                      |

Table S7-1. Coverage data from DNA analysis of the Ampliseq Oncomine Myeloid panel

| Sample    | Mapped reads | On target | Mean depth | Uniformity | Amplicons with at least 20 reads |
|-----------|--------------|-----------|------------|------------|----------------------------------|
| Kasumi-1  | 241,915      | 98.25%    | 462.3      | 86.81%     | 98.29%                           |
| Kasumi-2  | 478,591      | 98.45%    | 915.4      | 87.36%     | 98.86%                           |
| Kasumi-3  | 872,175      | 95.72%    | 1521.0     | 73.90%     | 95.82%                           |
| Kasumi-4  | 318,999      | 98.12%    | 605.8      | 90.33%     | 99.05%                           |
| Kasumi-5  | 419,097      | 98.23%    | 801.5      | 91.70%     | 98.86%                           |
| Kasumi-6  | 836,185      | 94.44%    | 1430.0     | 76.07%     | 97.15%                           |
| Kasumi-7  | 458,874      | 98.48%    | 877.6      | 91.51%     | 99.24%                           |
| Kasumi-8  | 275,409      | 98.58%    | 531.0      | 87.77%     | 98.67%                           |
| Kasumi-9  | 1,023,198    | 97.93%    | 1918.0     | 59.96%     | 99.05%                           |
| Kasumi-10 | 257,666      | 98.61%    | 495.9      | 90.26%     | 98.86%                           |

Table S7-2. Coverage data from RNA analysis of the Ampliseq Oncomine Myeloid panel

| Sample    | Unaligned Reads | Mapped Fusion Panel Reads | Expression Controls Total Reads |
|-----------|-----------------|---------------------------|---------------------------------|
| Kasumi-1  | 71,190          | 48931                     | 26796                           |
| Kasumi-2  | 18,086          | 12840                     | 5997                            |
| Kasumi-3  | 18,362          | 12020                     | 7294                            |
| Kasumi-4  | 40,699          | 30940                     | 16367                           |
| Kasumi-5  | 16,237          | 13807                     | 10751                           |
| Kasumi-6  | 106,308         | 53573                     | 34084                           |
| Kasumi-7  | 20,414          | 14156                     | 8946                            |
| Kasumi-8  | 36,005          | 22902                     | 15106                           |
| Kasumi-9  | 61,322          | 35559                     | 22133                           |
| Kasumi-10 | 29,917          | 20921                     | 12979                           |

Table S7-3. Coverage data from the Ampliseq On-Demand panel, IAD178152

| On-Demand | Mapped reads | On target | Mean depth | Uniformity | Amplicons with at least 20 reads |
|-----------|--------------|-----------|------------|------------|----------------------------------|
| Kasumi-2  | 1,143,785    | 94.75%    | 180.2      | 95.82%     | 97.42%                           |
| Kasumi-5  | 903,201      | 95.12%    | 142.2      | 95.66%     | 96.74%                           |
| Kasumi-7  | 1,031,913    | 95.00%    | 163.3      | 95.56%     | 97.00%                           |
| Kasumi-8  | 1,845,333    | 94.37%    | 291.0      | 95.38%     | 97.58%                           |
| Kasumi-9  | 3,462,158    | 94.33%    | 536.4      | 89.28%     | 97.95%                           |
| Kasumi-10 | 878,401      | 95.80%    | 139.4      | 96.03%     | 97.02%                           |
| SF-TY     | 743,458      | 94.18%    | 115.7      | 96.97%     | 97.40%                           |
| TIG-7-20  | 985,071      | 94.76%    | 154.0      | 96.73%     | 98.01%                           |

Table S7-4. Coverage data from the Precision ID Ancestry Panel

| HID       | Mapped reads | On target | Mean depth | Uniformity | Amplicons with at least 20 reads |
|-----------|--------------|-----------|------------|------------|----------------------------------|
| Kasumi-1  | 158,769      | 91.21%    | 904.0      | 59.94%     | 85.45%                           |
| Kasumi-2  | 66,572       | 93.96%    | 367.7      | 54.55%     | 73.33%                           |
| Kasumi-3  | 75,675       | 94.19%    | 429.9      | 53.17%     | 75.76%                           |
| Kasumi-4  | 67,830       | 94.03%    | 381.1      | 61.44%     | 79.39%                           |
| Kasumi-5  | 71,842       | 94.09%    | 405.6      | 57.28%     | 76.38%                           |
| Kasumi-6  | 50,715       | 92.27%    | 296.8      | 56.33%     | 67.88%                           |
| Kasumi-7  | 53,975       | 92.87%    | 317.2      | 58.19%     | 70.91%                           |
| Kasumi-8  | 118,925      | 91.66%    | 680.8      | 59.32%     | 84.85%                           |
| Kasumi-9  | 298,708      | 92.54%    | 1606.0     | 58.07%     | 90.30%                           |
| Kasumi-10 | 99,852       | 91.45%    | 578.8      | 58.12%     | 81.21%                           |
| SF-TY     | 89,490       | 94.20%    | 520.6      | 57.91%     | 80.61%                           |
| TIG-7-20  | 120,996      | 91.54%    | 673.1      | 58.92%     | 81.82%                           |

Table S9. Sequence variants identified by the Oncomine Myeloid panel

|           | Genes | Locus          | Genotype                                                       | Ref | Observed Allele                                                  | Type    | Length | Gene Class       | % Frequency | Array CN | Amino Acid Change                                                     | Coverage | Exon | Coding                                                                         | Variant Effect              |
|-----------|-------|----------------|----------------------------------------------------------------|-----|------------------------------------------------------------------|---------|--------|------------------|-------------|----------|-----------------------------------------------------------------------|----------|------|--------------------------------------------------------------------------------|-----------------------------|
| Kasumi-1  | KIT   | chr4:55599340  | T/A                                                            | T   | A                                                                | SNV     | 1      | Gain-of-function | 79.3        | 4        | p.Asn822Lys                                                           | 353      | 17   | c.2466T>A                                                                      | missense                    |
|           | TP53  | chr17:7577538  | T/T                                                            | C   | T                                                                | SNV     | 1      | Loss-of-function | 99.9        | 1        | p.Arg248Gln                                                           | 653      | 7    | c.743G>A                                                                       | missense                    |
| Kasumi-2  | HRAS  | chr11:534286   | C/T                                                            | C   | T                                                                | SNV     | 1      | Gain-of-function | 37.3        | 2        | p.Gly13Ser                                                            | 1609     | 2    | c.37G>A                                                                        | missense                    |
| Kasumi-3  | ETV6  | chr12:12022582 | CAG/C                                                          | CAG | C                                                                | INDEL   | 2      | Loss-of-function | 21.4        | 1        | p.Gln230fs                                                            | 1990     | 5    | c.689_690delAG                                                                 | frameshiftDeletion          |
| Kasumi-4  | GATA2 | chr3:128200730 | A/C                                                            | A   | C                                                                | SNV     | 1      | Gain-of-function | 46.2        | 2        | p.Leu359Val                                                           | 403      | 5    | c.1075T>G                                                                      | missense                    |
| Kasumi-6  | WT1   | chr11:32417851 | TCT/T                                                          | TCT | T                                                                | INDEL   | 2      | Loss-of-function | 49.2        | 2        | p.Arg401fs                                                            | 1975     | 7    | c.1199_1200delAG                                                               | frameshiftDeletion          |
|           | FLT3  | chr13:28608257 | T/TCATATTCATATTCTCT<br>GAAATCAACGTAGAAGTA<br>CTCATTATCTGAGGAGC | T   | TCATATTCATATTCTCT<br>GAAATCAACGTAGAAG<br>TACTCATTATCTGAGG<br>AGC | INDEL   | 51     | Gain-of-function | 16.6        | 3        | p.Gly583_Tyr599dup                                                    | 3211     | 14   | c.1798_1799insGCTCCTCAG<br>ATAATGAGTACTTCTACGTT<br>GATTTTCAGAGAATATGAATA<br>TG | nonframeshiftInsertion      |
|           | FLT3  | chr13:28608309 | C/CATATTCATATTCTCTG<br>AAATCAACGTAGAAGTAC<br>TCATTATCTGAGGAGCC | C   | CATATTCATATTCTCTG<br>AAATCAACGTAGAAGT<br>ACTCATTATCTGAGGA<br>GCC | FLT3ITD | 51     | Gain-of-function | 41.6        | 3        | p.Thr582_Gly583insGlySerSerAsnGluTyrPheTyrValAspPheArgGluTyrGluTyr    | 1480     | 14   | c.1746_1747insGGCTCCTCAGATAATGAGTACTTCTACGTTGATTTTCAGAGAATATGAATAT             | nonframeshiftInsertion      |
|           | TP53  | chr17:7577581  | C/C                                                            | A   | C,G,T                                                            | SNV     | 1      | Loss-of-function | 100.0       | 1        | p.Tyr234Asp                                                           | 1999     | 7    | c.700T>G                                                                       | missense                    |
|           | STAG2 | chrX:123224455 | A/A                                                            | G   | A                                                                | SNV     | 1      | Loss-of-function | 99.9        | 1        | p.Trp1103Ter                                                          | 697      | 31   | c.3308G>A                                                                      | nonsense                    |
| Kasumi-8  | ETV6  | chr12:12006443 | A/AAG                                                          | A   | AAG                                                              | INDEL   | 2      | Loss-of-function | 97.0        | 1        | p.Asn138fs                                                            | 430      | 4    | c.412_413insGA                                                                 | frameshiftInsertion         |
| Kasumi-10 | FLT3  | chr13:28608271 | T/AGGGAAATCTTCACTG<br>AAATCAACGTAGAAGTAC<br>TCATTAT            | T   | AGGGAAATCTTCACTG<br>AAATCAACGTAGAAGT<br>ACTCATTAT                | FLT3ITD | 41     | Gain-of-function | 27.3        | 2        | p.Glu596Ter                                                           | 491      | 14   | c.1785_1785delAinsATAATGAGTACTTCTACGTTGATTTTCAGTGAAGATTTCCCT                   | nonsense                    |
|           | FLT3  | chr13:28608271 | T/TCTGAAATCAACGTAGA<br>AGTACTCATTATCTGAGG<br>AGCCGGTCAAATATTCA | T   | TCTGAAATCAACGTAG<br>AAGTACTCATTATCTG<br>AGGAGCCGGTCAAATA<br>TTCA | INDEL   | 51     | Gain-of-function | 18.0        | 2        | p.Phe594_Arg595insSerGluTyrLeuThrGlySerSerAspAsnGluTyrPheTyrValAspPhe | 932      | 14   | c.1784_1785insTGAATATTTGACCGCTCCTCAGATAATGAGTACTTCTACGTTGATTTTCAG              | nonframeshiftInsertion      |
|           | FLT3  | chr13:28608276 | A/GGAGCCGGTCAAATAT<br>TCACTGAA                                 | A   | GGAGCCGGTCAAATAT<br>TCACTGAA                                     | FLT3ITD | 24     | Gain-of-function | 27.6        | 2        | p.Arg595fs                                                            | 497      | 14   | c.1780_1780delTinsTTCAGTGAATATTTGACCGGCTCC                                     | frameshiftBlockSubstitution |

Table S11-1. Kasumi-2

| Genes   | Locus          | Ref | Type | Kasumi-2 | Variant Frequency | Location                   | Amino Acid Change | Coding    |
|---------|----------------|-----|------|----------|-------------------|----------------------------|-------------------|-----------|
| RUNX3   | chr1:25228945  | T   | SNV  | T/C      | 15.0              | RUNX3:exonic:NM_004350.2   | p.Thr306Ala       | c.916A>G  |
| TAL1    | chr1:47691544  | G   | SNV  | G/A      | 46.2              | TAL1:exonic:NM_003189.5    | p.Pro6Leu         | c.17C>T   |
| TET2,   | chr4:106156139 | C   | SNV  | C/T      | 54.1              | TET2:exonic:NM_001127208.2 | p.Ala347Val       | c.1040C>T |
| NSD1    | chr5:176638269 | G   | SNV  | G/A      | 21.4              | NSD1:exonic:NM_022455.4    | p.Val957Ile       | c.2869G>A |
| CARD11  | chr7:2987368   | C   | SNV  | T/T      | 100.0             | CARD11:exonic:NM_032415.5  | p.Ala21Thr        | c.61G>A   |
| HGF     | chr7:81350061  | C   | SNV  | C/T      | 19.9              | HGF:exonic:NM_000601.5     | p.Arg424His       | c.1271G>A |
| HGF     | chr7:81350089  | A   | SNV  | A/G      | 20.8              | HGF:exonic:NM_000601.5     | p.Trp415Arg       | c.1243T>C |
| RET     | chr10:43604485 | T   | SNV  | T/C      | 11.0              | RET:exonic:NM_020975.4     | p.Val357Ala       | c.1070T>C |
| PTEN    | chr10:89711903 | A   | SNV  | A/G      | 11.5              | PTEN:exonic:NM_000314.6    | p.Tyr174Cys       | c.521A>G  |
| KRAS    | chr12:25398279 | C   | SNV  | C/G      | 48.4              | KRAS:exonic:NM_033360.3    | p.Val14Leu        | c.40G>C   |
| TP53    | chr17:7579882  | C   | SNV  | C/G      | 44.8              | TP53:exonic:NM_000546.5    | p.Glu11Gln        | c.31G>C   |
| NF1     | chr17:29653162 | G   | SNV  | G/T      | 55.4              | NF1:exonic:NM_001042492.2  | p.Glu1720Asp      | c.5160G>T |
| PRKAR1A | chr17:66524000 | G   | SNV  | G/A      | 10.1              | PRKAR1A:exonic:NM_212471.2 | p.Arg243Gln       | c.728G>A  |
| HCK     | chr20:30659499 | G   | SNV  | G/A      | 47.4              | HCK:exonic:NM_001172133.1  | p.Gly12Arg        | c.34G>A   |
| VSIG4   | chrX:65252402  | G   | SNV  | G/A      | 76.9              | VSIG4:exonic:NM_007268.2   | p.Ala201Val       | c.602C>T  |
| ATRX    | chrX:76940462  | G   | SNV  | A/A      | 100.0             | ATRX:exonic:NM_000489.4    | p.Arg211Cys       | c.631C>T  |

Table S11-2. Kasumi-5

| Genes  | Locus           | Ref | Type  | Kasumi-5 | Variant Frequency | Location                     | Amino Acid Change | Coding           |
|--------|-----------------|-----|-------|----------|-------------------|------------------------------|-------------------|------------------|
| FIP1L1 | chr4:54319259   | GAG | INDEL | GAG/G    | 11.8              | FIP1L1:exonic:NM_001134937.1 | p.Arg481fs        | c.1441_1442delAG |
| KIT    | chr4:55593461   | G   | SNV   | G/C      | 57.1              | KIT:exonic:NM_000222.2       | p.Val540Leu       | c.1618G>C        |
| KDR    | chr4:55980324   | A   | SNV   | A/G      | 51.2              | KDR:exonic:NM_002253.2       | p.Ile256Thr       | c.767T>C         |
| IL7R   | chr5:35874563   | C   | SNV   | C/G      | 39.7              | IL7R:exonic:NM_002185.4      | p.Pro240Arg       | c.719C>G         |
| IL7R   | chr5:35874565   | A   | SNV   | A/G      | 39.7              | IL7R:exonic:NM_002185.4      | p.Ile241Val       | c.721A>G         |
| IL7R   | chr5:35874569   | TA  | INDEL | TA/T     | 39.7              | IL7R:exonic:NM_002185.4      | p.Leu242fs        | c.726delA        |
| NSD1   | chr5:176638269  | G   | SNV   | G/A      | 23.5              | NSD1:exonic:NM_022455.4      | p.Val957Ile       | c.2869G>A        |
| NSD1   | chr5:176696787  | G   | SNV   | G/C      | 59.7              | NSD1:exonic:NM_022455.4      | p.Val1830Leu      | c.5488G>C        |
| NOTCH1 | chr9:139399368  | A   | SNV   | A/G      | 46.7              | NOTCH1:exonic:NM_017617.4    | p.Phe1592Ser      | c.4775T>C        |
| SVIL   | chr10:29840012  | C   | SNV   | C/T      | 41.5              | SVIL:exonic:NM_021738.2      | p.Arg114Gln       | c.341G>A         |
| HNF1A  | chr12:121416797 | G   | SNV   | G/A      | 49.3              | HNF1A:exonic:NM_000545.6     | p.Asp76Asn        | c.226G>A         |
| CREBBP | chr16:3778300   | T   | SNV   | T/C      | 51.5              | CREBBP:exonic:NM_004380.2    | p.Met2250Val      | c.6748A>G        |
| TP53   | chr17:7579350   | A   | SNV   | T/T      | 98.6              | TP53:exonic:NM_000546.5      | p.Phe113Ile       | c.337T>A         |
| SETBP1 | chr18:42533093  | A   | SNV   | A/G      | 56.7              | SETBP1:exonic:NM_015559.2    | p.Tyr1263Cys      | c.3788A>G        |

Table S11-3. Kasumi-7

| Genes  | Locus          | Ref | Type | Kasumi-7 | Variant Frequency | Location                  | Amino Acid Change | Coding    |
|--------|----------------|-----|------|----------|-------------------|---------------------------|-------------------|-----------|
| TRH    | chr3:129695847 | G   | SNV  | G/A      | 51.8              | TRH:exonic:NM_007117.4    | p.Glu173Lys       | c.517G>A  |
| TRIO   | chr5:14381290  | T   | SNV  | T/G      | 63.6              | TRIO:exonic:NM_007118.3   | p.Ser1167Ala      | c.3499T>G |
| PDGFRB | chr5:149502735 | G   | SNV  | G/A      | 48.2              | PDGFRB:exonic:NM_002609.3 | p.Arg685Cys       | c.2053C>T |
| NSD1   | chr5:176638269 | G   | SNV  | G/A      | 25.9              | NSD1:exonic:NM_022455.4   | p.Val957Ile       | c.2869G>A |
| NSD1   | chr5:176638327 | C   | SNV  | C/T      | 53.1              | NSD1:exonic:NM_022455.4   | p.Ala976Val       | c.2927C>T |
| ABL1   | chr9:133730221 | A   | SNV  | A/G      | 43.9              | ABL1:exonic:NM_005157.5   | p.Asn96Ser        | c.287A>G  |
| ABL1   | chr9:133760303 | A   | SNV  | A/G      | 59.4              | ABL1:exonic:NM_005157.5   | p.Arg876Gly       | c.2626A>G |
| PYGL   | chr14:51390767 | G   | SNV  | G/A      | 51.8              | PYGL:exonic:NM_002863.4   | p.Arg194Cys       | c.580C>T  |
| TOP2A  | chr17:38572272 | C   | SNV  | C/T      | 47.3              | TOP2A:exonic:NM_001067.3  | p.Arg106Lys       | c.317G>A  |

Table S11-4. Kasumi-8

| Genes | Locus          | Ref | Type  | Kasumi-8 | Variant Frequency | Location                | Amino Acid Change | Coding         |
|-------|----------------|-----|-------|----------|-------------------|-------------------------|-------------------|----------------|
| APC   | chr5:112177427 | G   | SNV   | G/T      | 50.6              | APC:exonic:NM_000038.5  | p.Ala2046Ser      | c.6136G>T      |
| NSD1  | chr5:176638269 | G   | SNV   | G/A      | 26.4              | NSD1:exonic:NM_022455.4 | p.Val957Ile       | c.2869G>A      |
| ETV6  | chr12:12006443 | A   | INDEL | AAG/AAG  | 99.0              | ETV6:exonic:NM_001987.4 | p.Asn138fs        | c.412_413insGA |



Table S11-5. Kasumi-9

| Genes | Locus          | Ref                      | Type  | Kasumi-9                   | Variant Frequency | Location                   | Amino Acid Change    | Coding                            |
|-------|----------------|--------------------------|-------|----------------------------|-------------------|----------------------------|----------------------|-----------------------------------|
| RPL5  | chr1:93299200  | A                        | SNV   | A/G                        | 17.2              | RPL5:exonic:NM_000969.4    | p.Arg58Gly           | c.172A>G                          |
| RPL5  | chr1:93299205  | TATCAT                   | INDEL | TATCAT/T                   | 17.3              | RPL5:exonic:NM_000969.4    | p.Ile60fs            | c.178_182delATCAT                 |
| RPL5  | chr1:93303115  | C                        | INDEL | C/CT                       | 31.6              | RPL5:exonic:NM_000969.4    | p.Leu211fs           | c.632_633insT                     |
| GLI2  | chr2:121748219 | G                        | SNV   | G/A                        | 47.9              | GLI2:exonic:NM_005270.4    | p.Glu1577Lys         | c.4729G>A                         |
| TRH   | chr3:129695847 | G                        | SNV   | G/A                        | 50.8              | TRH:exonic:NM_007117.4     | p.Glu173Lys          | c.517G>A                          |
| MECOM | chr3:168834110 | C                        | SNV   | C/T                        | 31.5              | MECOM:exonic:NM_004991.3   | p.Ser517Asn          | c.1550G>A                         |
| NSD1  | chr5:176638269 | G                        | SNV   | G/A                        | 26.3              | NSD1:exonic:NM_022455.4    | p.Val957Ile          | c.2869G>A                         |
| DDX41 | chr5:176938914 | C                        | SNV   | C/T                        | 18.9              | DDX41:exonic:NM_016222.3   | p.Ala583Thr          | c.1747G>A                         |
| BMP6  | chr6:7862663   | G                        | SNV   | G/A                        | 52.2              | BMP6:exonic:NM_001718.5    | p.Arg379Gln          | c.1136G>A                         |
| EZH2  | chr7:148526829 | C                        | SNV   | C/T                        | 18.6              | EZH2:exonic:NM_004456.4    | p.Gly159Arg          | c.475G>A                          |
| JAK2  | chr9:5080268   | T                        | SNV   | T/C                        | 54.1              | JAK2:exonic:NM_004972.3    | p.Ile724Thr          | c.2171T>C                         |
| SPI1  | chr11:47377073 | T                        | SNV   | T/A                        | 47.2              | SPI1:exonic:NM_001080547.1 | p.Tyr174Phe          | c.521A>T                          |
| NCOA3 | chr20:46279851 | GCAGCAG<br>CAGCAGC<br>AA | INDEL | GCAGCAG<br>CAGCAGC<br>AA/G | 33.3              | NCOA3:exonic:NM_181659.2   | p.Gln1260_Gln1264del | c.3783_3797delGCAG<br>CAGCAACAGCA |

Table S11-6. Kasumi-10

| Genes   | Locus          | Ref | Type  | Kasumi-10                                                    | Variant Frequency | Location                    | Amino Acid Change | Coding                                                              |
|---------|----------------|-----|-------|--------------------------------------------------------------|-------------------|-----------------------------|-------------------|---------------------------------------------------------------------|
| NSD1    | chr5:176638269 | G   | SNV   | G/A                                                          | 18.5              | NSD1:exonic:NM_022455.4     | p.Val957Ile       | c.2869G>A                                                           |
| C6orf10 | chr6:32260907  | C   | INDEL | C/CT                                                         | 16.9              | C6orf10:exonic:NM_006781.4  | p.Glu515fs        | c.1542_1543insA                                                     |
| GATA3   | chr10:8115837  | G   | SNV   | G/A                                                          | 47.1              | GATA3:exonic:NM_001002295.1 | p.Ala396Thr       | c.1186G>A                                                           |
| FLT3    | chr13:28608270 | C   | INDEL | C/CAGGGAAA<br>TCTTCACTGA<br>AATCAACGT<br>AGAAGTACT<br>CATTAA | 35.9              | FLT3:exonic:NM_004119.2     | p.Glu596Ter       | c.1785_1786insTAAT<br>GAGTACTTCTACGT<br>TGATTTTCAGTGAAG<br>ATTTCCCT |
| FLT3    | chr13:28608275 | A   | INDEL | A/AGGAGCCG<br>GTCAAATATT<br>CACTGA                           | 34.0              | FLT3:exonic:NM_004119.2     | p.Arg595fs        | c.1780_1781insTCAG<br>TGAATATTTGACCG<br>GCTCC                       |
| FLT3    | chr13:28623544 | T   | SNV   | T/G                                                          | 48.9              | FLT3:exonic:NM_004119.2     | p.Gln338Pro       | c.1013A>C                                                           |
| PER1    | chr17:8053928  | G   | SNV   | G/A                                                          | 49.3              | PER1:exonic:NM_002616.2     | p.His33Tyr        | c.97C>T                                                             |

Table S12. Fusion genes identified by the Oncomine Myeloid panel

| Sample    | Genes (Exons)         | Read Counts | Read Counts Per Million | Variant ID               | Locus                           | Translocation               |
|-----------|-----------------------|-------------|-------------------------|--------------------------|---------------------------------|-----------------------------|
| Kasumi-1  | RUNX1(3) - RUNX1T1(3) | 5748        | 117471.5                | RUNX1-RUNX1T1.R3R3       | chr21:36231771 - chr8:93029591  | t(8;21)(q21.3;q22.1)        |
| Kasumi-2  | TCF3(16) - PBX1(3)    | 2967        | 231074.8                | TCF3-PBX1.T16P3.COSF1489 | chr19:1619110 - chr1:164761731  | t(1;19)(q23.3;p13.3)        |
| Kasumi-4  | BCR(13) - ABL1(2)     | 1073        | 34680.0                 | BCR-ABL1.B13A2           | chr22:23631808 - chr9:133729451 | t(9;22;11)(q34.1;q11.2;q13) |
| Kasumi-8  | BCR(1) - ABL1(2)      | 1067        | 46589.8                 | BCR-ABL1.B1A2            | chr22:23524426 - chr9:133729451 | t(9;22)(q34.1;q11.2)        |
| Kasumi-10 | KMT2A(9) - MLLT1(2)   | 200         | 9559.8                  | KMT2A-MLLT1.K9M2         | chr11:118355029 - chr19:6270770 | t(11;19)(q23.3;p13.3)       |
|           | KMT2A(10) - MLLT1(2)  | 232         | 11089.3                 | KMT2A-MLLT1.K10M2        | chr11:118355690 - chr19:6270770 | t(11;19)(q23.3;p13.3)       |

Table S14. Comparison of cell marker expression from flow cytometric analysis

|           |         | CD3 |     | CD4 |      | CD8 |     | CD10 |      | CD13 |      | CD14 |     | CD16 |     | CD19 |      | CD20 |      | CD22 |      |
|-----------|---------|-----|-----|-----|------|-----|-----|------|------|------|------|------|-----|------|-----|------|------|------|------|------|------|
| Kasumi-3  | AML     | -   | 0.1 | ++  | 59.4 | -   | 0.3 | +-   | 3.1  | +    | 37.0 | -    | 0.3 | -    | 0.9 | -    | 0    | -    | 0.1  | +    | 36.3 |
| Kasumi-1  | AML     | -   | 0.2 | +-  | 14.9 | -   | 1.5 | -    | 1.5  | -    | 1.9  | -    | 0.9 | -    | 1.2 | -    | 0.2  | -    | 0.3  | -    | 0.7  |
| Kasumi-6  | AML     | -   | 0.1 | -   | 0.9  | -   | 0.1 | -    | 0.2  | +-   | 2.1  | -    | 0.1 | -    | 0.2 | -    | 0.1  | -    | 0    | -    | 0.1  |
| Kasumi-4  | CML     | -   | 0.0 | +   | 39.1 | -   | 0.2 | -    | 0.5  | +    | 37.7 | -    | 0.2 | -    | 0.5 | -    | 0.1  | -    | 0    | -    | 0.6  |
| Kasumi-5  | T-ALL   | -   | 0.7 | -   | 0.8  | -   | 0.3 | ++   | 67.4 | +-   | 4.1  | -    | 1.6 | -    | 0.8 | -    | 0    | -    | 0.3  | -    | 0.6  |
| Kasumi-2  | BCP-ALL | -   | 0.1 | -   | 0.0  | -   | 0.4 | ++   | 72.8 | -    | 1.8  | -    | 0.1 | -    | 0.4 | +++  | 97.6 | +    | 27.1 | +++  | 97.5 |
| Kasumi-7  | BCP-ALL | -   | 0.2 | -   | 0.3  | -   | 0   | -    | 0.8  | -    | 0.2  | -    | 0.7 | -    | 0.1 | ++   | 54.1 | -    | 0.3  | ++   | 65.3 |
| Kasumi-8  | BCP-ALL | -   | 0.2 | +-  | 2.8  | -   | 0.1 | +++  | 100  | -    | 0.3  | -    | 0.4 | -    | 0.3 | +++  | 99.8 | -    | 0.2  | +++  | 100  |
| Kasumi-9  | BCP-ALL | -   | 0.2 | -   | 0.4  | -   | 0.8 | +-   | 2.4  | -    | 0.1  | -    | 0.4 | -    | 1.1 | +++  | 99.1 | +-   | 5.6  | +++  | 99.7 |
| Kasumi-10 | BCP-ALL | -   | 0.3 | -   | 0.7  | -   | 0.5 | -    | 1.1  | -    | 1.4  | -    | 2.0 | -    | 0.6 | +++  | 85.8 | -    | 0.5  | +    | 44.4 |

|           |         | CD23 |     | CD25 |     | CD30 |      | CD33 |      | CD34 |      | CD38 |      | CD45 |      | CD56 |      | HLA-A,B,C |      | HLA-DR |      |
|-----------|---------|------|-----|------|-----|------|------|------|------|------|------|------|------|------|------|------|------|-----------|------|--------|------|
| Kasumi-3  | AML     | -    | 0.1 | -    | 0.1 | -    | 0.1  | +    | 45.3 | +++  | 100  | +++  | 97.0 | +++  | 99.3 | +++  | 80.6 | +++       | 95.4 | +-     | 7.6  |
| Kasumi-1  | AML     | -    | 0.5 | -    | 0.2 | -    | 0.6  | +-   | 13.7 | +    | 41.5 | +-   | 14.3 | ++   | 53.4 | -    | 0.6  | +++       | 93.3 | -      | 0.9  |
| Kasumi-6  | AML     | -    | 0   | -    | 0.9 | -    | 0.2  | ++   | 63.7 | -    | 0.2  | +    | 39.3 | +    | 36.5 | -    | 0.1  | +++       | 99.2 | -      | 0.3  |
| Kasumi-4  | CML     | -    | 0   | +-   | 4.2 | -    | 0.5  | +-   | 14.9 | +-   | 5.6  | -    | 1.2  | +++  | 99.1 | +++  | 92.5 | +++       | 100  | +-     | 13.1 |
| Kasumi-5  | T-ALL   | -    | 0.5 | -    | 0.2 | +-   | 16.7 | -    | 1.1  | -    | 0.4  | +++  | 100  | +++  | 85.9 | +-   | 12.0 | +++       | 99.9 | -      | 0.2  |
| Kasumi-2  | BCP-ALL | -    | 0.1 | -    | 0.1 | +-   | 3.2  | -    | 0.1  | -    | 0.6  | +++  | 99.2 | +++  | 91.7 | -    | 0.1  | +++       | 100  | +-     | 5.4  |
| Kasumi-7  | BCP-ALL | -    | 0.2 | -    | 0.3 | -    | 0.3  | -    | 0.9  | -    | 0.2  | +++  | 96.7 | -    | 0.3  | -    | 0.2  | +++       | 100  | +-     | 2.1  |
| Kasumi-8  | BCP-ALL | -    | 0.3 | -    | 0.1 | -    | 0.1  | -    | 0.2  | -    | 0.1  | +++  | 96.3 | ++   | 64.1 | -    | 0.2  | +++       | 100  | ++     | 54.6 |
| Kasumi-9  | BCP-ALL | -    | 0.3 | -    | 0.1 | +-   | 12.4 | -    | 0.3  | -    | 1.2  | +++  | 99.8 | -    | 0.2  | -    | 0.4  | +++       | 100  | ++     | 64.8 |
| Kasumi-10 | BCP-ALL | +-   | 9.9 | +-   | 2.9 | -    | 0.3  | +-   | 4.8  | -    | 0.5  | +++  | 98.6 | +++  | 89.3 | -    | 0.4  | +++       | 99.9 | +      | 47.7 |
